1  
2  
3  
4  
5  
6  
7  
8  
9  
10  
11  
12  
13  
14  
15  
16  
17  
18  
19  
20  
21  
22  
23  
24  
25  
26  
27  
28  
29  
30  
31  
32  
33  
34  
35  
36  
37  
38  
39

## **Crif1 Promotes Osteoporosis in Mice after Radiation**

**Lixin Xiang<sup>1,5</sup>, Li Chen<sup>1,5</sup>, Yang Xiang<sup>1,2</sup>, Fengjie Li<sup>1</sup>, Xiaomei Zhang<sup>1</sup>, Yanni Xiao<sup>1</sup>,  
Lingyun Zou<sup>3</sup>, Jiang F. Zhong<sup>2</sup>, Shengwen Calvin Li<sup>4</sup>, Qian Ran<sup>1,2,\*</sup>, Zhongjun Li<sup>1,\*</sup>**

1 Laboratory Medicine Center, Lab of Radiation Biology, The Second Affiliated Hospital,  
Third Military Medical University, Chongqing 400037, China

2 Division of Periodontology, Diagnostic Sciences & Dental Hygiene, and Division of  
Biomedical Sciences, Herman Ostrow School of Dentistry, University of Southern California,  
Los Angeles, CA 90089, USA

3 Bioinformatics Center, College of Basic Medical Sciences, Third Military Medical  
University, Chongqing, 400038, China

4 CHOC Children's Hospital Research Institute, University of California, Irvine, 1201 West  
La Veta Ave, Orange, CA 92868, USA

5 These authors contributed equally to this work.

\*Correspondence: [louise-r-q@163.com](mailto:louise-r-q@163.com) ( Q.R.), [johnneyusc@gmail.com](mailto:johnneyusc@gmail.com) (Z.L.)

## 40 **Abstract**

41 Radiation induces rapid bone loss and enhances bone resorption and RANKL expression.  
42 RANKL provides the crucial signal to induce osteoclast differentiation and plays an  
43 important role in bone resorption. However, the mechanisms of radiation-induced  
44 osteoporosis are not fully understood. Here, we show that Crif1 expression increases in bone  
45 marrow cells after radiation. Conditional Crif1 deletion in bone marrow cells causes  
46 decreases in RANKL expression and the RANKL/OPG ratio, and relieves bone loss after  
47 radiation in mice. We further demonstrated *in vitro* that Crif1 promotes RANKL secretion via  
48 the cAMP/PKA pathway. Moreover, protein–protein docking screening identified five  
49 compounds as Crif1 inhibitors; these compounds dramatically suppressed RANKL secretion  
50 and CREB phosphorylation when cells were exposed to forskolin. This study enriches current  
51 knowledge of the pathogenesis of osteoporosis and provides insights into potential  
52 therapeutic strategies for osteoporosis treatment.

53

54 **Key words** Crif1, PKA, RANKL, Osteoporosis, Radiation

55

## 56 **Introduction**

57 Osteoporosis is a high-incidence disease closely associated with radiotherapy, hormonal  
58 status, age and glucocorticoid treatment. It is characterized by an imbalance in skeletal  
59 turnover with reduced bone formation and enhanced bone resorption, leading to an increased  
60 risk of bone fracture(Khosla & Hofbauer, 2017; Phetfong et al., 2016). Osteoblasts are the  
61 bone-forming cells derived from bone marrow mesenchymal stem/stromal cells (BM-MSCs)  
62 and play an important role in the regulation of bone mass. Meanwhile, osteoclasts are the  
63 principal cells capable of resorbing bone and play an essential role in bone  
64 remodelling(Rachner, Khosla, & Hofbauer, 2011). Exposure to radiation, such as  
65 radiotherapy for cancer, can cause rapid mineral loss and increase the number of osteoclasts  
66 within metabolically active, cancellous bone tissue, leading to structural deficits. However,  
67 the mechanisms of radiation-induced bone loss are not fully understood. Current treatment of  
68 osteoporosis is based mainly on inhibiting bone resorption or stimulating bone generation to  
69 increase bone mass, novel treatment strategies that have a dual mechanisms should be  
70 developed.

71 Osteoclasts are large, multinucleated cells derived from haematopoietic progenitors of the  
72 monocyte macrophage lineage(Boyle, Simonet, & Lacey, 2003). Their differentiation is  
73 mainly regulated by macrophage colony-stimulating factor (M-CSF), RANK ligand  
74 (RANKL), and osteoprotegerin (OPG)(Teitelbaum, 2000). M-CSF is required for osteoclast  
75 survival and proliferation, but RANKL and OPG play central roles in the activation of  
76 osteoclastogenesis(Boyce & Xing, 2007). By binding to its receptor RANK (on  
77 haematopoietic progenitors), RANKL provides the crucial signal to induce osteoclast  
78 differentiation from haematopoietic progenitor cells as well as to activate mature osteoclasts.  
79 OPG is a soluble decoy receptor that can bind to RANKL and negatively regulate RANKL  
80 binding to RANK(Wada, Nakashima, Hiroshi, & Penninger, 2006). BM-MSCs, osteocytes,  
81 osteoblasts, adipocytes, and activated T and B lymphocytes are the main sources of RANKL  
82 secretion. RANKL expression is promoted by radiation, inflammation, cytokines, hormones  
83 and a number of other agents, including those that signal through cyclic adenosine  
84 monophosphate (cAMP)/protein kinase A (PKA), glycoprotein 130 (gp130) and vitamin D  
85 receptor (VDR)(Martin & Sims, 2015; Nakashima et al., 2011).

86 Crif1 is a multifunctional protein that can interact with many proteins to induce cell

87 cycle arrest, modulate oxidative stress, and regulate transcriptional activity through  
88 interactions with the DNA-binding domains of transcription factors(Chen et al., 2017; Chung  
89 et al., 2003; Kang, Hong, Kim, & Bae, 2010; Park et al., 2005; Ran et al., 2014). It is also the  
90 constitutive protein of the large mitoribosomal subunit required for the synthesis and  
91 insertion of mitochondrial-encoded OxPhos polypeptides into the mitochondrial  
92 membrane(Greber et al., 2015). Crif1 deficiency in macrophages impairs mitochondrial  
93 oxidative function and causes systemic insulin resistance and adipose tissue  
94 inflammation(Jung et al., 2018). Our previous study showed that Crif1 promotes adipogenic  
95 differentiation of BM-MSCs after radiation by modulating the cAMP/PKA signalling  
96 pathway(Zhang et al., 2015).

97 In this study, we investigated the role of Crif1 in osteoporosis after radiation. To address  
98 this question *in vivo*, we generated a *Crif1* bone marrow-specific conditional knockout mouse  
99 model. Conditional *Crif1* deletion causes decreases in RANKL expression and the  
100 RANKL/OPG ratio and reduces bone loss after radiation. In this study, we demonstrate that  
101 Crif1 promotes osteoporosis by regulating RANKL expression via the cAMP/PKA pathway.  
102 Through screening, we also identify five compounds that could effectively inhibit RANKL  
103 expression.

104

## 105 **Results**

### 106 **Radiation induces osteoporosis in mice**

107 To confirm the extent of bone loss over the short term after irradiation, we irradiated mice  
108 with a single dose of 5 Gy, and then, 7 days later, we harvested the left femurs. Micro-CT  
109 analysis of the distal femurs of males and females at 12 weeks of age revealed significant  
110 decreases in trabecular bone volume/total volume (BV/TV) (Figures 1A and 1B),  
111 connectivity density (Conn.D) (Figure 1C), trabecular number (Tb.N\*) (Figure 1D), and bone  
112 mineral density (vBMD) (Figure 1E), but also showed significant increases in trabecular  
113 spacing (Tb.Sp\*) (Figure 1G) and structure model index (SMI) (Figure 1H). There was no  
114 significant difference in trabecular thickness (Tb.Th\*) (Figure 1F). Haematoxylin and eosin  
115 (H&E) staining of femoral sections from irradiated mice showed significantly decreased  
116 trabecular bone compared to controls (Figure 1I). Paraffin sections of femurs showed more  
117 TRAP-positive cells in irradiated mice than in control mice (Figure 1J). These results  
118 indicated that bone resorption was enhanced after radiation and validated the model of  
119 radiation-induced osteoporosis. Moreover, RT-qPCR data revealed dramatic increases in  
120 RANKL expression (Figure 1K) and the RANKL/OPG ratio in irradiated bone marrow cells  
121 (Figure 1L). OPG expression was not affected by radiation treatment (Figure 1K). Notably,  
122 expression of Crif1 also increased in irradiated bone marrow cells compared with control  
123 cells 7 days after irradiation (Figure 1M).

### 124 **Conditional Crif1 deletion from bone marrow relieves bone loss after radiation**

125 To explore the possible relationship between Crif1 and RANKL, we constructed a bone  
126 marrow cell-specific Crif1-deficient mouse model by crossing *Crif1<sup>fl/fl</sup>* mice to  
127 *B6.129P2-Lyz2tm1(cre)/Nju* mice to generate *Lyz2Cre;Crif1<sup>fl/fl</sup>* mice (Figure 2A) and treated  
128 the mice with a single dose of 5 Gy. RT-qPCR results demonstrated that *Lyz2Cre;Crif1<sup>fl/fl</sup>* mice  
129 had lower RANKL expression (Figure 2B) and RANKL/OPG ratio in bone marrow cells  
130 after radiation compared to *Crif1<sup>fl/fl</sup>* mice (Figure 2C). OPG expression in bone marrow cells  
131 was not affected by *Crif1* deletion (Figure 2B). Therefore, we speculated that Crif1 may be  
132 involved in the regulation of RANKL expression. To further assess the effects of *Crif1*  
133 deletion on osteoporosis, trabecular bone parameters of femurs were evaluated by micro-CT

134 analysis. Conditional *Crif1* deletion from bone marrow had no effect on bone mass (Figures  
135 2D-2K). Although trabecular bone volume/total volume, connectivity density and trabecular  
136 number all decreased in *Crif1<sup>fl/fl</sup>* mice and *Lyz2Cre;Crif1<sup>fl/fl</sup>* mice after radiation compared to  
137 nonirradiated mice, these three parameters were significantly higher in irradiated  
138 *Lyz2Cre;Crif1<sup>fl/fl</sup>* mice than in irradiated *Crif1<sup>fl/fl</sup>* mice (Figures 2E, 2F and 2G). Notably,  
139 trabecular spacing in *Crif1<sup>fl/fl</sup>* mice and *Lyz2Cre;Crif1<sup>fl/fl</sup>* mice both increased visibly after  
140 radiation, but the increase in *Lyz2Cre;Crif1<sup>fl/fl</sup>* mice was less than that of *Crif1<sup>fl/fl</sup>* mice after  
141 radiation treatment (Figure 2J). Furthermore, bone mineral density decreased (Figure 2H) and  
142 structural model index increased (Figure 2K) only in irradiated *Crif1<sup>fl/fl</sup>* mice compared to  
143 nonirradiated controls, while no remarkable changes in these parameters were detected  
144 between nonirradiated and irradiated *Lyz2Cre;Crif1<sup>fl/fl</sup>* mice (Figure 2H and 2K). In addition,  
145 trabecular thickness was not influenced by *Crif1* deletion or radiation treatment (Figure 2I).  
146 H&E staining of paraffin sections of femurs confirmed the previously reported micro-CT  
147 data depicting the reduced loss of trabecular tissue in *Lyz2Cre;Crif1<sup>fl/fl</sup>* mice compared to  
148 *Crif1<sup>fl/fl</sup>* mice after radiation (Figure 2L). We also detected a decreased number of  
149 TRAP-positive osteoclasts in irradiated *Lyz2Cre;Crif1<sup>fl/fl</sup>* mice compared to irradiated *Crif1<sup>fl/fl</sup>*  
150 mice, indicating weakened bone resorption (Figure 2M). Taken together, these data suggested  
151 that conditional *Crif1* deletion could alleviate bone resorption and reduce bone loss after  
152 radiation.

### 153 **Overexpression of Crif1 in BM-MSCs increases RANKL secretion and the ratio of** 154 **RANKL to OPG**

155 To investigate the role of *Crif1* in osteoporosis *in vitro*, we transfected mouse BM-MSCs  
156 with a *Crif1* lentiviral overexpression vector (Figure 3A). For osteoclast induction *in vitro*,  
157 *Crif1*-overexpressing BM-MSCs and RAW264.7 cells were cocultured in a 12-well transwell  
158 unit for 7 days. RT-qPCR results showed that the relative mRNA expression of RANKL and  
159 RANKL/OPG ratio both increased in *Crif1*-overexpressing BM-MSCs compared to controls  
160 after 7 days of coculture (Figure 3B and 3C). Concentrations of RANKL and OPG in  
161 coculture medium were also detected by ELISA. *Crif1*-overexpressing BM-MSCs produced  
162 high levels of RANKL compared to the control (Figure 3D), while there was no significant  
163 difference in OPG concentration between the two groups (Figure 3E). The RANKL/OPG  
164 ratio in *Crif1*-overexpressing BM-MSCs was higher than in the control (Figure 3F). We also  
165 detected an increased number of tartrate-resistant alkaline phosphatase (TRAP)-positive cells  
166 in RAW264.7 cells cocultured with *Crif1*-overexpressing BM-MSCs (Figures 3G and 3H).  
167 These data suggested that *Crif1* could promote RANKL expression and may be involved in  
168 osteoclast differentiation.

### 169 **Crif1 is involved in the regulation of RANKL expression after radiation**

170 To further confirm whether *Crif1* played an important role in osteoporosis after radiation, we  
171 knocked out *Crif1* in RAW264.7 cells and BM-MSCs (Figures 4A and 4D), respectively.  
172 Deletion of *Crif1* from RAW264.7 cells did not affect RANK expression or osteoclast  
173 differentiation (Figures 4A, 4B and 4C). We previously demonstrated that *Crif1* expression  
174 was upregulated after radiation (Zhang et al., 2015), and in this study, we found that RANKL  
175 expression and the RANKL/OPG ratio were also elevated after radiation (Figures 4E, 4F, 4G  
176 and 4I). Meanwhile, more TRAP-positive cells were found in RAW264.7 cells cocultured  
177 with BM-MSCs after radiation (Figures 4J and 4K). However, knocking out *Crif1* in  
178 BM-MSCs could significantly reduce RANKL expression and the RANKL/OPG ratio both  
179 before and after radiation (Figures 4E, 4F, 4G and 4I). OPG expression was not affected by  
180 *Crif1* deletion or radiation treatment (Figures 4E and 4H). Moreover, the number of

181 TRAP-positive cells also decreased in *Crif1* knockout BM-MSCs compared to the control  
182 after 7 days of coculture (Figures 4J and 4K). These results further demonstrated that *Crif1*  
183 can regulate RANKL expression, especially after radiation.

#### 184 ***Crif1* mediates adipogenesis and RANKL secretion in adipocytes**

185 To determine whether *Crif1* affects RANKL expression in adipocytes, BM-MSCs were  
186 grown in mouse mesenchymal stem cell adipogenic differentiation medium. Consistent with  
187 our previous research (Zhang et al., 2015), more BM-MSCs became strongly predisposed to  
188 adipogenesis (Figures 5A, 5B and 5C). Recently, it was reported that bone marrow  
189 adipocytes can secrete RANKL (Fan et al., 2017). Here, we found an obvious increase in  
190 RANKL expression and RANKL/OPG ratio in irradiated BM-MSCs after adipogenic  
191 induction (Figures 5D, 5E, 5F and 5H). However, knocking out *Crif1* in BM-MSCs reduced  
192 both adipogenesis and RANKL expression (Figures 5C, 5D and 5F). OPG expression was not  
193 affected by *Crif1* deletion or radiation treatment (Figures 5D and 5G). These data suggested  
194 that *Crif1* mediates adipogenesis and RANKL secretion in adipocytes.

#### 195 ***Crif1* promotes RANKL secretion by modulating the cAMP/PKA signalling pathway**

196 To verify the mechanism underlying *Crif1*-mediated upregulation of RANKL expression,  
197 PKA agonist (forskolin) and inhibitor (H89) were added to the coculture system. Although  
198 RANKL expression and the RANKL/OPG ratio were both increased after treatment with 25  
199  $\mu\text{M}$  forskolin, these effects were significantly weakened in *Crif1* knockout BM-MSCs  
200 (Figures 6A, 6B, 6C and 6E). In addition, RANKL expression and the RANKL/OPG ratio  
201 were both decreased when *Crif1*-overexpressing BM-MSCs and controls were treated with  
202 20  $\mu\text{M}$  H89 (Figures 6F, 6G, 6H and 6J). OPG expression was not affected by forskolin or  
203 H89 treatment (Figures 6A, 6D, 6F and 6H). The most TRAP-positive cells were found in the  
204 coculture with forskolin-treated BM-MSCs (Figures 6K and 6L), the fewest TRAP-positive  
205 cells were found in the coculture with H89-treated cells (Figures 6M and 6N). After the  
206 addition of forskolin, CREB phosphorylation was significantly increased in the control  
207 BM-MSCs, but was dramatically inhibited in *Crif1* knockout BM-MSCs (Figure 6O). We  
208 also observed that CREB phosphorylation was suppressed in both *Crif1*-overexpressing  
209 BM-MSCs and controls following exposure to H89 (Figure 6P). These results demonstrated  
210 that *Crif1* promotes RANKL expression through cAMP/PKA signalling pathway.

#### 211 ***Crif1* inhibitors effectively suppress RANKL secretion and CREB phosphorylation**

212 We used ClusPro and InterProSurf to investigate the interface in *Crif1*-PKA $\alpha$  complex, and  
213 results showed that Thr<sup>197</sup>, Gly<sup>200</sup>, Thr<sup>201</sup>, Glu<sup>203</sup>, and Phe<sup>129</sup> of PKA $\alpha$  interact with Ile<sup>132</sup>,  
214 Met<sup>128</sup>, Ile<sup>121</sup>, His<sup>120</sup>, and Arg<sup>117</sup> in the long alpha helical region of *Crif1*, forming the binding  
215 interface (Figure 7A). A virtual screening using 462,608 compounds from the Life Chemicals  
216 database around His<sup>120</sup> of *Crif1* was carried out using the program Autodock\_vina. A set of  
217 13 compounds was selected for experimental screening based on binding energy  $<-12.0$   
218 kcal/mol (Table S1). Initially a tetrazolium salt (WST-8) assay was carried out to study  
219 potential toxic effects of these compounds on hBM-MSCs, vero cells and mouse BM-MSCs  
220 (Figures S1-S3). The compounds F0382-0033, F3408-0076, F1430-0134, F3408-0031 and  
221 F1430-0130 showed low toxicity to hBM-MSCs at concentrations of 25  $\mu\text{M}$  (Figure 7G-7K).  
222 The binding pattern in these ligand-protein complexes potentially contained multiple  
223 interactions dominated by hydrophobic amino acids (Figure 7B-7F). To determine whether  
224 these 5 *Crif1* inhibitors affected RANKL expression, hBM-MSCs were pretreated with these  
225 compounds followed by treatment with forskolin. ELISA analysis of supernatant medium  
226 revealed that RANKL expression was dramatically decreased by treatment with *Crif1*  
227 inhibitors (Figure 7L). OPG expression could be significantly increased by F1430-0134



228 (Figure 7M). Moreover, RANKL/OPG ratios were also decreased by these 5 inhibitors  
229 (Figure 7N). To further understand the mechanism, CREB phosphorylation was detected.  
230 Western blotting analysis showed that CREB phosphorylation was inhibited by treatment  
231 with the 5 inhibitors that showed suppressive effects on RANKL expression (Figure 7O).

## 232 Discussion

233 Radiation exposure (due to radiotherapy, accidental causes or terrorism) causes  
234 irreparable damage to tissues and organs such as bone marrow. It suppresses bone formation  
235 and elevates resorption, disturbing the balance between them and leading to a dramatic  
236 decline in trabecular bone(D'Oronzo, Stucci, Tucci, & Silvestris, 2015; Jia, Gaddy, Suva, &  
237 Corry, 2011). In this study, we treated mice with a single dose of 5 Gy to generate a model of  
238 radiation-induced osteoporosis. RANKL expression and RANKL/OPG ratios actually  
239 increased in the surviving bone marrow cells after radiation, which was consistent with a  
240 previous study(Alwood et al., 2015). Meanwhile, expression of *Crif1* and bone resorption  
241 also increased, indicating a relationship between RANKL and *Crif1* in osteoporosis.  
242 BM-MSCs, osteoblasts, adipocytes and activated T lymphocytes in bone marrow are the  
243 main source of RANKL secretion(Boyce & Xing, 2008; Honma et al., 2013); thus, to  
244 elucidate the possible role of *Crif1* in RANKL expression, we generated bone marrow  
245 cell-specific *Crif1*-deficient mice. Conditional *Crif1* deletion from bone marrow could reduce  
246 RANKL expression and relieve bone loss after radiation, suggesting that *Crif1* is involved in  
247 RANKL expression and osteoporosis.

248 BM-MSCs, which are a major and important component of the haematopoietic  
249 microenvironment, secrete soluble RANKL and OPG(Horowitz, Xi, Wilson, & Kacena, 2001;  
250 Morrison & Scadden, 2014). In our study, overexpression of *Crif1* in BM-MSCs resulted in  
251 an increase in RANKL secretion, while deletion of *Crif1* from BM-MSCs significantly  
252 reduced RANKL expression. BM-MSCs are pluripotent and are the progenitors of both bone  
253 marrow osteocytes and adipocytes. The balance between osteogenic and adipogenic  
254 differentiation of BM-MSCs also plays a pivotal role in maintaining bone homeostasis(Mori  
255 et al., 2014; Yue, Zhou, Shimada, Zhao, & Morrison, 2016). Excessive numbers of  
256 adipocytes are often found in the bone marrow of patients with osteoporosis. A recent study  
257 revealed that bone marrow adipocytes can also secrete RANKL and accelerate  
258 osteoclastogenesis(Fan et al., 2017). Moreover, after radiation exposure, the haematopoietic  
259 red marrow gradually turns to yellow, a phenomenon known as bone marrow fattening.  
260 Compared to other cells in bone marrow, BM-MSCs are more resistant to radiation; however,  
261 radiation impairs the balance between osteogenic and adipogenic differentiation of  
262 BM-MSCs, decreasing osteogenesis while increasing RANKL expression and  
263 adipogenesis(Cao et al., 2011). We previously reported that *Crif1* can promote the  
264 adipogenesis of BM-MSCs. Here, we found that deletion of *Crif1* from BM-MSCs can  
265 reduce both adipogenesis and RANKL expression. Osteogenesis and adipogenesis in the  
266 bone marrow are inversely correlated, so reduced adipogenesis results in an increase in the  
267 osteoblast pool(Muruganandan, Roman, & Sinal, 2009; Nuttall & Gimble, 2000).

268 RANKL functions as an osteoclast-activating factor, and its binding to RANK induces  
269 the activation of transcription factors such as c-fos, NFAT, and nuclear factor kappa B  
270 (NF- $\kappa$ B) in preosteoclasts and initiates several downstream signalling pathways, especially  
271 the NF- $\kappa$ B pathway(Nakashima, Hayashi, & Takayanagi, 2012). RANKL expression can be  
272 upregulated by many agents, such as PTH and forskolin. Forskolin can stimulate RANKL  
273 expression through the cAMP/PKA signalling pathway(Kondo, Guo, & Bringhurst, 2002;  
274 Tseng et al., 2010). However, deletion of *Crif1* from BM-MSCs impairs the promotion of

275 RANKL expression by forskolin. Moreover, overexpression of *Crif1* in BM-MSCs does not  
276 increase RANKL expression upon exposure to a PKA inhibitor. Our previous study revealed  
277 that *Crif1* can interact with PKA and promote adipogenesis. Here, we further demonstrated  
278 that *Crif1* can also promote RANKL expression through the cAMP/PKA signalling pathway.

279 Drugs for the treatment of osteoporosis could be divided into anabolic and antiresorptive  
280 categories. Bisphosphonates (including alendronate and ibandronate), oestrogen, selective  
281 oestrogen receptor modulators (SERMs), and denosumab are antiresorptive drugs, whereas  
282 parathyroid hormone (PTH) and its analogues are anabolic agents (Andreopoulou & Bockman,  
283 2015; Favus, 2010; Torstrick & Guldborg, 2014). However, the long-term adverse effects of  
284 these anti-osteoporotic drugs should be considered, such as hypocalcaemia, arthralgia, nausea,  
285 and especially the development of breast cancer and risks of cardiovascular events and  
286 thromboembolism associated with treatment with oestrogen and SERMs (Black & Rosen,  
287 2016; Khan, Cheung, & Khan, 2017). Therefore, it is necessary to look for new drugs with  
288 high efficiency but few side effects. Because of the importance of RANKL in osteoclast  
289 differentiation, RANKL-secreting cells, which play a central role in osteoclastogenesis, are  
290 the targets of most antiresorptive agents (Dempster, Lambing, Kostenuik, & Grauer, 2012;  
291 Tella & Gallagher, 2014). Future drug screening should target not only the regulation of the  
292 balance between bone formation and bone resorption but also the balance between osteogenic  
293 and adipogenic differentiation. Here, through screening, we identified five compounds that  
294 effectively inhibit *Crif1* activity in the cAMP/PKA signalling pathway. These five  
295 compounds may have dual actions on bone metabolism, both increasing bone formation and  
296 decreasing bone resorption and adipogenesis.

297 In summary, we demonstrated that *Crif1* plays a crucial role in osteoporosis and that  
298 conditional *Crif1* deletion reduces bone loss after radiation. Moreover, through screening, we  
299 identified five *Crif1* inhibitors that could dramatically reduce RANKL secretion and CREB  
300 phosphorylation. This study enriches current knowledge of the pathogenesis of  
301 radiation-induced osteoporosis and provides insights into potential therapeutic strategies for  
302 osteoporosis treatment.

## 303 **Materials and Methods**

### 304 **Mouse Strains**

305 Male and female C57BL/6 mice (aged 12-14 weeks) were purchased from Beijing HFK  
306 Bio-Technology Co. Ltd. *B6.129P2-Lyz2tm1(cre)/Nju* mice were received as a gift from  
307 Assistant Professor Tao Wang (Third Military Medical University). *Crif1<sup>fl/fl</sup>* mice were  
308 constructed by Nanjing BioMedical Research Institute of Nanjing University (NBRI).  
309 *Lyz2Cre;Crif1<sup>fl/fl</sup>* mice were generated by crossing *Crif1<sup>fl/fl</sup>* mice to  
310 *B6.129P2-Lyz2tm1(cre)/Nju* transgenic mice. For radiation treatment, mice were irradiated  
311 with 5 Gy Co-60 at a rate of 0.69 Gy/minute. Blood was collected at 7 days after irradiation,  
312 and serum from each mouse was analysed individually in triplicate.

### 313 **Cell culture and treatment**

314 For *in vitro* study, mouse bone marrow mesenchymal stem/stromal cells (BM-MSCs)  
315 purchased from Cyagen Biosciences were cultured in mouse mesenchymal stem cell medium  
316 (MUCMX-90011, Cyagen Biosciences) at 37°C and 5% CO<sub>2</sub>. For radiation treatment, mouse  
317 BM-MSCs were irradiated with 9 Gy Co-60 at a rate of 0.69 Gy/minute.

318 RAW264.7 cells were cultured in Dulbecco's modified Eagle medium (DMEM, HyClone)  
319 supplemented with 10% FBS.

320 For osteoclast induction, RAW264.7 cells and mouse BM-MSCs were cocultured in a  
321 12-well transwell unit (0.4 µm) for 7 days with or without forskolin (25 µM) or H89 (20 µM)

322 treatment. After 7 days of coculture, cells were collected for RT-qPCR and Western blotting;  
323 meanwhile, supernatant medium was collected for ELISA.

324 Human bone marrow mesenchymal stem/stromal cells (hBM-MSCs) (catalogue No. 7500,  
325 ScienCell) were cultured in mesenchymal stem cell medium (catalogue No. 7501, ScienCell)  
326 at 37 °C and 5% CO<sub>2</sub>.

### 327 ***Crif1* knockout and overexpression in vitro**

328 For *Crif1* overexpression, mouse BM-MSCs were transfected with a *Crif1* lentiviral  
329 overexpression vector (pLV[Exp]-EGFP:T2A:Puro-EF1A>mGadd45gip1  
330 [NM\_183358.4]) constructed by Cyagen Biosciences (vector ID: VB180112-1182ypt) and  
331 selected with 5 µg/ml puromycin dihydrochloride (A1113803, Invitrogen). An empty vector  
332 (pLV[Exp]-EGFP:T2A:Puro-Null, vector ID: VB160420-1011mqh, Cyagen Biosciences) was  
333 included as a control.

334 For *Crif1* knockout, mouse BM-MSCs were first transfected with lentiCas9-Blast vector  
335 (Genomeditech) and selected with 5 µg/ml blasticidin S HCl (A1113903, Invitrogen). Then,  
336 cells were transfected with CRISPR/Cas9 M\_Gadd45gip1 gRNA vector (target sequence:  
337 GCGGGGGCGCACGGTAGCTG, Genomeditech) and selected with 5 µg/ml puromycin  
338 dihydrochloride. An empty vector (LentiGuide-Puro-Scramble-gRNA, Genomeditech) was  
339 included as a control.

### 340 ***In vitro* adipogenic differentiation**

341 To induce adipogenesis, mouse BM-MSCs were treated in mouse mesenchymal stem cell  
342 adipogenic differentiation medium (MUCMX-90031, Cyagen Biosciences). After  
343 differentiation, we preserved the supernatant medium for ELISA and fixed the cells  
344 with 2 ml of 4% formaldehyde solution for 30 minutes. Then, the cells were stained with 1  
345 ml oil red O working solution (catalogue No. S0131, Cyagen Biosciences) for 30 minutes and  
346 visualized with a light microscope (Leica DMIRB, Heidelberg, Germany). The dye from oil  
347 red O staining was extracted using isopropanol, and the optical density at 510 nm was  
348 measured using a Varioskan FLASH microplate reader.

### 349 **Micro-CT analysis**

350 Femurs were dissected, fixed overnight in 4% paraformaldehyde, and stored in 1%  
351 paraformaldehyde at 4°C. Trabecular bone parameters were measured in the distal metaphysis  
352 of the femur. We started analysing slices at the bottom of the distal growth plate, where the  
353 epiphyseal cap structure completely disappeared and continued for 95 slices (10.5 µm/slice,  
354 using SCANCO VivaCT40) towards the proximal end of the femur.

### 355 **Isolation of bone marrow cells**

356 Femurs were collected and cleaned in sterile PBS, and both ends of each femur were trimmed  
357 off. Bones were placed in a 0.6-mL microcentrifuge tube that was cut open at the bottom and  
358 nested inside a 1.5-mL microcentrifuge tube. Fresh bone marrow was spun out by brief  
359 centrifugation (from 0 to 10,000 rpm, 9 s). Red blood cells were lysed using RBC lysis buffer  
360 (catalogue NO. RT122-02, TIANGEN). After centrifugation (3,000 rpm, 5 minutes), cells at  
361 the bottom layer were collected for Western blotting and RT-qPCR assays(Fan et al., 2017).

### 362 **Western blotting and antibodies**

363 Protein expression in the samples was analysed by Western blotting. Total protein lysates  
364 were extracted with cell lysis buffer for Western blotting and immunoprecipitation (catalogue  
365 No. P0013, Beyotime) and denatured by boiling. Protein samples were resolved on 12%  
366 SDS-polyacrylamide gels and transferred to polyvinylidene fluoride membranes (PVDF  
367 Western Blotting Membranes; Roche). Membranes were blocked in PBS containing 5% (w/v)  
368 nonfat dry milk and 0.1% TWEEN 20 and then incubated with the appropriate primary



369 antibodies overnight at 4 °C. Membranes were washed with TBST three times, and then  
370 incubated with the appropriate horseradish peroxidase-conjugated secondary antibodies for 1  
371 h at 24 °C. Immunoreactive bands were detected by the BeyoECL Plus reagent (P0018,  
372 Beyotime) using a Photo-Image System (Molecular Dynamics, Sunnyvale, CA, USA). The  
373 primary antibodies used for blotting were as follows: Crif1 (M-222) (sc-134882; Santa Cruz),  
374 RANK (H-7) (sc-374360; Santa Cruz), A-FABP (AP2, sc-18661; Santa Cruz), PPAR $\gamma$   
375 (sc-7273; Santa Cruz),  $\beta$ -actin (sc-47778; Santa Cruz), phospho-CREB rabbit mAb (#9198;  
376 Cell Signaling Technology), and CREB rabbit mAb (#9197; Cell Signaling Technology).

### 377 **RT-qPCR**

378 Real-time quantitative polymerase chain reaction (RT-qPCR) was used to analyse the mRNA  
379 levels of selected genes in collected samples. Total RNA was extracted using TRIzol Reagent  
380 (catalogue No. 10296010, Invitrogen) according to the manufacturer's instructions.  
381 First-strand cDNA was synthesized from 1  $\mu$ g of RNA using the PrimeScript RT Reagent Kit  
382 with gDNA Eraser (catalogue No. RR047A, TaKaRa). qPCR was performed in triplicate in  
383 20- $\mu$ l reactions containing SYBR Premix Ex Taq II (catalogue No. RR820A, TaKaRa). The  
384 reaction protocol was as follows: heating for 30 s at 95°C, followed by 40 cycles of  
385 amplification (5 s at 95°C, 30 s at 60°C).

386 The sequences of the RT-PCR primers were as follows:

387 M-actin-F: AGCCATGTACGTAGCCATCC,

388 M-actin-R: CTCAGCTGTGGTGGTGAA,

389 M-Rankl-F: GCTCCGAGCTGGTGAAGAAA,

390 M-Rankl-R:CCCCAAAGTACGTCGCATCT,

391 M-OPG-F: GTTCCTGCACAGCTTCACAA,

392 M-OPG-R: AAACAGCCCAGTGACCATTC.

### 393 **ELISA**

394 The concentrations of RANKL and OPG were measured using the Mouse RANKL (Receptor  
395 Activator of Nuclear Factor Kappa B Ligand) ELISA Kit (E-EL-M0644c, elabscience),  
396 Human sRANKL (Soluble Receptor Activator of Nuclear factor-kB Ligand) ELISA Kit  
397 (E-EL-H5558c, elabscience), Mouse OPG (Osteoprotegerin) ELISA Kit (E-EL-M0081c,  
398 elabscience) and Human OPG (Osteoprotegerin) ELISA Kit (E-EL-H1341c, elabscience)  
399 according to the manufacturer's instructions. Assays were performed in triplicate.

### 400 **Tartrate-resistant acid phosphatase (TRAP) staining**

401 After the 7-day coculture period, cells were washed once with PBS, fixed in 10% formalin  
402 for 10 minutes, and incubated with a substrate solution, naphthol AS-BI phosphate (catalogue  
403 No. 387, Sigma), in the presence of 50 mM sodium tartrate at 37 °C for 1 h. The resulting  
404 mononuclear and multinuclear TRAP-positive cells were visualized by light microscopy and  
405 quantified.

### 406 **Histochemistry and histomorphometric analysis**

407 Femurs were dissected, fixed overnight in 4% paraformaldehyde, decalcified in 10% EDTA  
408 (pH 7.0) for 20 days and embedded in paraffin. Longitudinally oriented sections of bone 4  
409  $\mu$ m thick, including the metaphysis and diaphysis, were processed for histochemistry and  
410 haematoxylin and eosin (H&E) staining. Dewaxed sections were also stained for  
411 tartrate-resistant acid phosphatase (TRAP) activity to identify osteoclasts. Sections were  
412 incubated in TRAP stain for 45 minutes at 37°C.

### 413 **Crif1 inhibitor screening**

414 ClusPro and InterProSurf were used to investigate the interface in Crif1-PKA $\alpha$  complex. A  
415 virtual screening using 462,608 compounds from the Life Chemicals database around His<sup>120</sup>

416 of Crif1 was carried out using the program Autodock\_vina. For inhibitor screening,  
417 hBM-MSCs were cultured in 6-well plates and pretreated with 5 different compounds (25  
418  $\mu\text{M}$ ). After 3 hours of pretreatment, forskolin (25  $\mu\text{M}$ ) was added to the medium. After 1  
419 hour of forskolin treatment, total protein lysates were extracted for CREB phosphorylation  
420 detection, and 3 days later, supernatant medium was collected for ELISA.

#### 421 **Tetrazolium salt (WST-8) assay**

422 A tetrazolium salt (WST-8) assay was carried out to study the toxicity of compounds to  
423 hBM-MSCs. hBM-MSCs seeded at a density of 3000 cells per well in 96-well plate were  
424 treated with 5 different compounds at 8 final concentrations (3.125  $\mu\text{M}$ , 6.25  $\mu\text{M}$ , 12.5  $\mu\text{M}$ ,  
425 25  $\mu\text{M}$ , 50  $\mu\text{M}$ , 100  $\mu\text{M}$ , 200  $\mu\text{M}$ , 400  $\mu\text{M}$ ). Three days later, 10  $\mu\text{l}$  cell counting kit-8 solution  
426 was added to each well. After 4 hours of incubation, the absorbance at 450 nm was measured  
427 using a Varioskan FLASH microplate reader (Thermo).

#### 428 **Statistical analysis**

429 The mRNA expression levels of RANKL and OPG in the tested samples were determined as  
430 the cycle threshold (CT) level, and normalized copy numbers (relative quantification) were  
431 calculated using the  $\Delta\Delta\text{CT}$  equation as follows:  $\Delta\Delta\text{CT} = \Delta\text{CT}$  of the bone marrow sample  
432  $-\Delta\text{CT}$  of  $\beta$ -actin, and then the normalized copy number (relative quantification)  $= 2^{-\Delta\Delta\text{CT}}$ . Data  
433 are presented as the mean  $\pm$ SD. Statistical significance was assessed using a two-tailed paired  
434 Student's t-test. The results were considered significant when \*  $p < 0.05$  or \*\*  $p < 0.01$ .

#### 435 **Study approval**

436 All animal studies performed were approved by the Institutional Animal Care and Use  
437 Committee at the Third Military Medical University.

438 **Acknowledgements:** This work was supported by the National Natural Science Foundation  
439 of China (no.81502754), the Interdisciplinary and International Cooperation Projects of The  
440 Second Affiliated Hospital, Third Military Medical University (no. 2016YXKJC0) and the  
441 National Natural Science Foundation of China (no.31571352).

442 **Author Contributions:** Z.L., L.X., Q.R. and L.C.: conceived the project; L.X. and Q.R.:  
443 designed and performed most experiments and data analysis with input; Y.X., F.L., M.Z.,  
444 L.C., Y.X., L.Z., J.F.Z. and S.C.L.: assisted with experiments; L.X.: wrote and edited the  
445 manuscript.

446 **Declaration of Interests:** The authors have declared that no conflict of interest exists.

#### 447 **References**

- 448 Alwood, J. S., Shahnazari, M., Chicana, B., Schreurs, A. S., Kumar, A., Bartolini, A., . . .  
449 Globus, R. K. (2015). Ionizing Radiation Stimulates Expression of  
450 Pro-Osteoclastogenic Genes in Marrow and Skeletal Tissue. *J Interferon Cytokine*  
451 *Res*, 35(6), 480-487. doi:10.1089/jir.2014.0152
- 452 Andreopoulou, P., & Bockman, R. S. (2015). Management of postmenopausal osteoporosis.  
453 *Annu Rev Med*, 66, 329-342. doi:10.1146/annurev-med-070313-022841
- 454 Black, D. M., & Rosen, C. J. (2016). Postmenopausal Osteoporosis. *N Engl J Med*, 374(21),  
455 2096-2097. doi:10.1056/NEJMc1602599
- 456 Boyce, B. F., & Xing, L. (2007). Biology of RANK, RANKL, and osteoprotegerin. *Arthritis Res*  
457 *Ther*, 9 Suppl 1, S1. doi:10.1186/ar2165
- 458 Boyce, B. F., & Xing, L. (2008). Functions of RANKL/RANK/OPG in bone modeling and  
459 remodeling. *Arch Biochem Biophys*, 473(2), 139-146.

- 460 doi:10.1016/j.abb.2008.03.018
- 461 Boyle, W. J., Simonet, W. S., & Lacey, D. L. (2003). Osteoclast differentiation and activation.  
462 *Nature*, 423(6937), 337-342. doi:10.1038/nature01658
- 463 Cao, X., Wu, X., Frassica, D., Yu, B., Pang, L., Xian, L., . . . Frassica, F. J. (2011). Irradiation  
464 induces bone injury by damaging bone marrow microenvironment for stem cells.  
465 *Proc Natl Acad Sci U S A*, 108(4), 1609-1614. doi:10.1073/pnas.1015350108
- 466 Chen, L., Ran, Q., Xiang, Y., Xiang, L., Li, F., Wu, J., . . . Li, Z. (2017). Co-Activation of PKC- $\delta$   
467 by CRIF1 Modulates Oxidative Stress in Bone Marrow Multipotent Mesenchymal  
468 Stromal Cells after Irradiation by Phosphorylating NRF2 Ser40. *Theranostics*, 7(10),  
469 2634-2648. doi:10.7150/thno.17853
- 470 Chung, H. K., Yi, Y. W., Jung, N. C., Kim, D., Suh, J. M., Kim, H., . . . Shong, M. (2003).  
471 CR6-interacting factor 1 interacts with Gadd45 family proteins and modulates the  
472 cell cycle. *J Biol Chem*, 278(30), 28079-28088. doi:M212835200 [pii]  
473 10.1074/jbc.M212835200
- 474 D'Oronzo, S., Stucci, S., Tucci, M., & Silvestris, F. (2015). Cancer treatment-induced bone  
475 loss (CTIBL): pathogenesis and clinical implications. *Cancer Treat Rev*, 41(9),  
476 798-808. doi:10.1016/j.ctrv.2015.09.003
- 477 Dempster, D. W., Laming, C. L., Kostenuik, P. J., & Grauer, A. (2012). Role of RANK ligand  
478 and denosumab, a targeted RANK ligand inhibitor, in bone health and osteoporosis:  
479 a review of preclinical and clinical data. *Clin Ther*, 34(3), 521-536.  
480 doi:10.1016/j.clinthera.2012.02.002
- 481 Fan, Y., Hanai, J. I., Le, P. T., Bi, R., Maridas, D., DeMambro, V., . . . Lanske, B. (2017).  
482 Parathyroid Hormone Directs Bone Marrow Mesenchymal Cell Fate. *Cell Metab*,  
483 25(3), 661-672. doi:10.1016/j.cmet.2017.01.001
- 484 Favus, M. J. (2010). Bisphosphonates for osteoporosis. *N Engl J Med*, 363(21), 2027-2035.  
485 doi:10.1056/NEJMct1004903
- 486 Greber, B. J., Bieri, P., Leibundgut, M., Leitner, A., Aebersold, R., Boehringer, D., & Ban, N.  
487 (2015). Ribosome. The complete structure of the 55S mammalian mitochondrial  
488 ribosome. *Science*, 348(6232), 303-308. doi:10.1126/science.aaa3872
- 489 Honma, M., Ikebuchi, Y., Kariya, Y., Hayashi, M., Hayashi, N., Aoki, S., & Suzuki, H. (2013).  
490 RANKL subcellular trafficking and regulatory mechanisms in osteocytes. *J Bone*  
491 *Miner Res*, 28(9), 1936-1949. doi:10.1002/jbmr.1941
- 492 Horowitz, M. C., Xi, Y., Wilson, K., & Kacena, M. A. (2001). Control of osteoclastogenesis  
493 and bone resorption by members of the TNF family of receptors and ligands.  
494 *Cytokine Growth Factor Rev*, 12(1), 9-18.
- 495 Jia, D., Gaddy, D., Suva, L. J., & Corry, P. M. (2011). Rapid loss of bone mass and strength  
496 in mice after abdominal irradiation. *Radiat Res*, 176(5), 624-635.
- 497 Jung, S. B., Choi, M. J., Ryu, D., Yi, H. S., Lee, S. E., Chang, J. Y., . . . Shong, M. (2018).  
498 Reduced oxidative capacity in macrophages results in systemic insulin resistance.  
499 *Nat Commun*, 9(1), 1551. doi:10.1038/s41467-018-03998-z
- 500 Kang, H. J., Hong, Y. B., Kim, H. J., & Bae, I. (2010). CR6-interacting factor 1 (CRIF1)  
501 regulates NF-E2-related factor 2 (NRF2) protein stability by proteasome-mediated  
502 degradation. *J Biol Chem*, 285(28), 21258-21268. doi:M109.084590 [pii]  
503 10.1074/jbc.M109.084590
- 504 Khan, M., Cheung, A. M., & Khan, A. A. (2017). Drug-Related Adverse Events of  
505 Osteoporosis Therapy. *Endocrinol Metab Clin North Am*, 46(1), 181-192.  
506 doi:10.1016/j.ecl.2016.09.009

- 507 Khosla, S., & Hofbauer, L. C. (2017). Osteoporosis treatment: recent developments and  
508 ongoing challenges. *Lancet Diabetes Endocrinol*, *5*(11), 898-907.  
509 doi:10.1016/S2213-8587(17)30188-2
- 510 Kondo, H., Guo, J., & Bringhurst, F. R. (2002). Cyclic adenosine monophosphate/protein  
511 kinase A mediates parathyroid hormone/parathyroid hormone-related protein  
512 receptor regulation of osteoclastogenesis and expression of RANKL and  
513 osteoprotegerin mRNAs by marrow stromal cells. *J Bone Miner Res*, *17*(9),  
514 1667-1679. doi:10.1359/jbmr.2002.17.9.1667
- 515 Martin, T. J., & Sims, N. A. (2015). RANKL/OPG; Critical role in bone physiology. *Rev Endocr*  
516 *Metab Disord*, *16*(2), 131-139. doi:10.1007/s11154-014-9308-6
- 517 Mori, K., Suzuki, K., Hozumi, A., Goto, H., Tomita, M., Koseki, H., . . . Osaki, M. (2014).  
518 Potentiation of osteoclastogenesis by adipogenic conversion of bone  
519 marrow-derived mesenchymal stem cells. *Biomed Res*, *35*(2), 153-159.
- 520 Morrison, S. J., & Scadden, D. T. (2014). The bone marrow niche for haematopoietic stem  
521 cells. *Nature*, *505*(7483), 327-334. doi:10.1038/nature12984
- 522 Muruganandan, S., Roman, A. A., & Sinal, C. J. (2009). Adipocyte differentiation of bone  
523 marrow-derived mesenchymal stem cells: cross talk with the osteoblastogenic  
524 program. *Cell Mol Life Sci*, *66*(2), 236-253. doi:10.1007/s00018-008-8429-z
- 525 Nakashima, T., Hayashi, M., Fukunaga, T., Kurata, K., Oh-Hora, M., Feng, J. Q., . . .  
526 Takayanagi, H. (2011). Evidence for osteocyte regulation of bone homeostasis  
527 through RANKL expression. *Nat Med*, *17*(10), 1231-1234. doi:10.1038/nm.2452
- 528 Nakashima, T., Hayashi, M., & Takayanagi, H. (2012). New insights into osteoclastogenic  
529 signaling mechanisms. *Trends Endocrinol Metab*, *23*(11), 582-590.  
530 doi:10.1016/j.tem.2012.05.005
- 531 Nuttall, M. E., & Gimble, J. M. (2000). Is there a therapeutic opportunity to either prevent  
532 or treat osteopenic disorders by inhibiting marrow adipogenesis? *Bone*, *27*(2),  
533 177-184.
- 534 Park, K. C., Song, K. H., Chung, H. K., Kim, H., Kim, D. W., Song, J. H., . . . Shong, M. (2005).  
535 CR6-interacting factor 1 interacts with orphan nuclear receptor Nur77 and inhibits  
536 its transactivation. *Mol Endocrinol*, *19*(1), 12-24. doi:10.1210/me.2004-0107
- 537 Phetfong, J., Sanvoranart, T., Nartprayut, K., Nimsanor, N., Seenprachawong, K.,  
538 Prachayasittikul, V., & Supokawej, A. (2016). Osteoporosis: the current status of  
539 mesenchymal stem cell-based therapy. *Cell Mol Biol Lett*, *21*, 12.  
540 doi:10.1186/s11658-016-0013-1
- 541 Rachner, T. D., Khosla, S., & Hofbauer, L. C. (2011). Osteoporosis: now and the future.  
542 *Lancet*, *377*(9773), 1276-1287. doi:10.1016/S0140-6736(10)62349-5
- 543 Ran, Q., Hao, P., Xiao, Y., Xiang, L., Ye, X., Deng, X., . . . Li, Z. (2014). CRIF1 interacting with  
544 CDK2 regulates bone marrow microenvironment-induced G0/G1 arrest of leukemia  
545 cells. *PLoS One*, *9*(2), e85328. doi:10.1371/journal.pone.0085328
- 546 Teitelbaum, S. L. (2000). Bone resorption by osteoclasts. *Science*, *289*(5484), 1504-1508.
- 547 Tella, S. H., & Gallagher, J. C. (2014). Prevention and treatment of postmenopausal  
548 osteoporosis. *J Steroid Biochem Mol Biol*, *142*, 155-170.  
549 doi:10.1016/j.jsbmb.2013.09.008
- 550 Torstrick, F. B., & Guldberg, R. E. (2014). Local strategies to prevent and treat osteoporosis.  
551 *Curr Osteoporos Rep*, *12*(1), 33-40. doi:10.1007/s11914-014-0191-6
- 552 Tseng, W., Graham, L. S., Geng, Y., Reddy, A., Lu, J., Effros, R. B., . . . Tintut, Y. (2010).  
553 PKA-induced receptor activator of NF-kappaB ligand (RANKL) expression in vascular



- 554 cells mediates osteoclastogenesis but not matrix calcification. *J Biol Chem*, 285(39),  
555 29925-29931. doi:10.1074/jbc.M110.117366
- 556 Wada, T., Nakashima, T., Hiroshi, N., & Penninger, J. M. (2006). RANKL-RANK signaling in  
557 osteoclastogenesis and bone disease. *Trends Mol Med*, 12(1), 17-25.  
558 doi:10.1016/j.molmed.2005.11.007
- 559 Yue, R., Zhou, B. O., Shimada, I. S., Zhao, Z., & Morrison, S. J. (2016). Leptin Receptor  
560 Promotes Adipogenesis and Reduces Osteogenesis by Regulating Mesenchymal  
561 Stromal Cells in Adult Bone Marrow. *Cell Stem Cell*, 18(6), 782-796.  
562 doi:10.1016/j.stem.2016.02.015
- 563 Zhang, X., Xiang, L., Ran, Q., Liu, Y., Xiang, Y., Xiao, Y., . . . Li, Z. (2015). Crif1 Promotes  
564 Adipogenic Differentiation of Bone Marrow Mesenchymal Stem Cells After  
565 Irradiation by Modulating the PKA/CREB Signaling Pathway. *Stem Cells*, 33(6),  
566 1915-1926. doi:10.1002/stem.2019

567  
568  
569  
570  
571  
572  
573  
574  
575  
576  
577  
578  
579  
580  
581  
582  
583  
584  
585  
586  
587  
588  
589  
590  
591  
592  
593  
594  
595  
596  
597  
598  
599  
600

601 **Figures:**

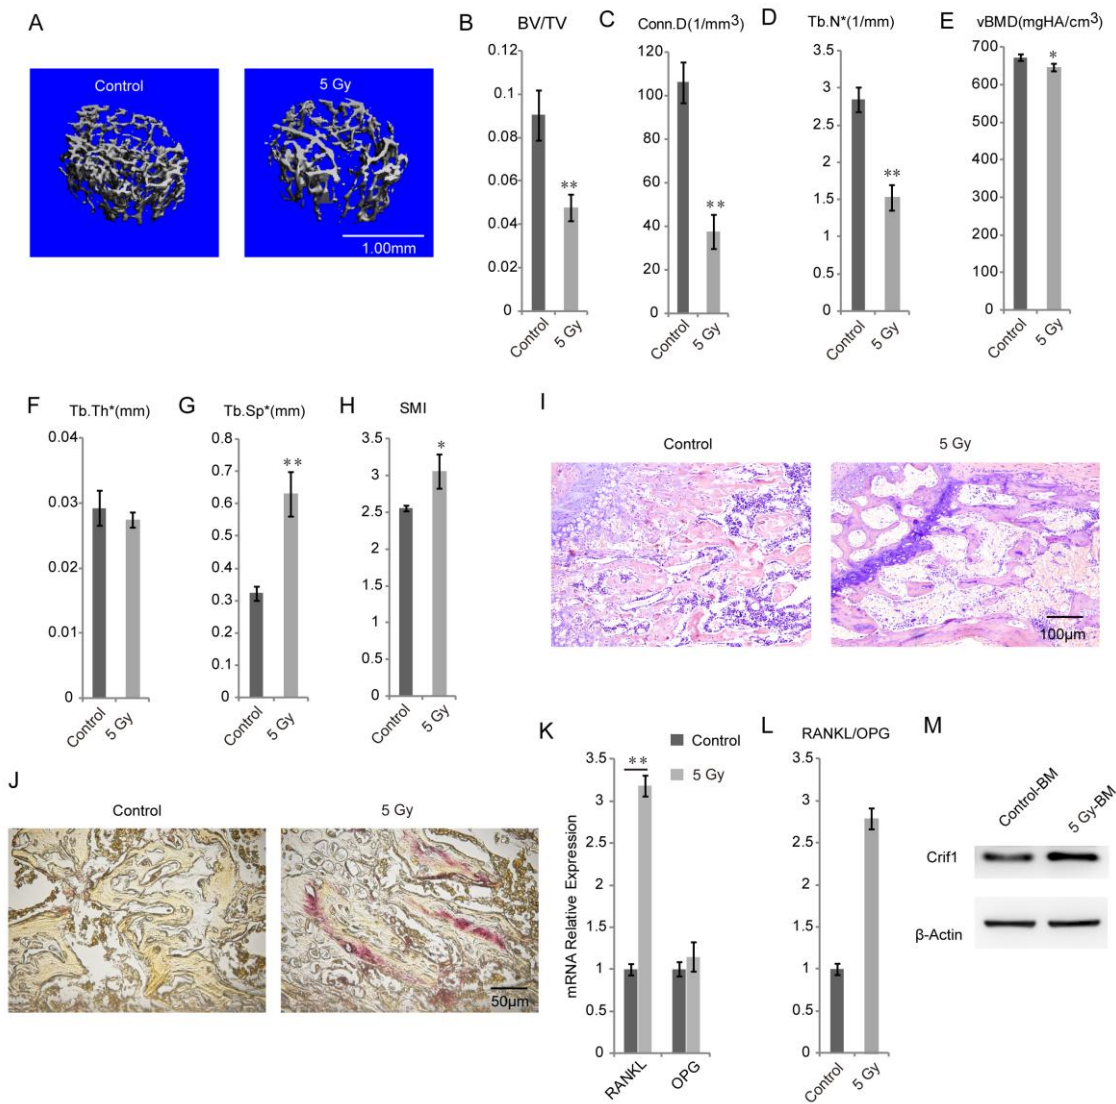

602

603 **Figure 1. Radiation induces osteoporosis in mice**

604 (A) Micro-CT images of the distal metaphysis of the femur.

605 (B-H) Micro-CT analysis of the trabecular bone volume/total volume (B), connectivity  
606 density (C), trabecular number (D), bone mineral density (E), trabecular thickness (F),  
607 trabecular spacing (G), and structure model index (H).

608 (I) H&E staining of femoral sections from irradiated mice and controls.

609 (J) TRAP staining of femoral sections from irradiated mice and controls.

610 (K) RT-qPCR analysis of RANKL and OPG mRNA expression in flushed whole bone  
611 marrow.

612 (L) RANKL/OPG ratio of RT-qPCR results.

613 (M) Western blotting analysis of Crif1 expression in flushed whole bone marrow.

614 \**P* < 0.05, \*\**P* < 0.01. All experiments were performed in triplicate, and the bars represent  
615 the mean ± SD.

616

617

618

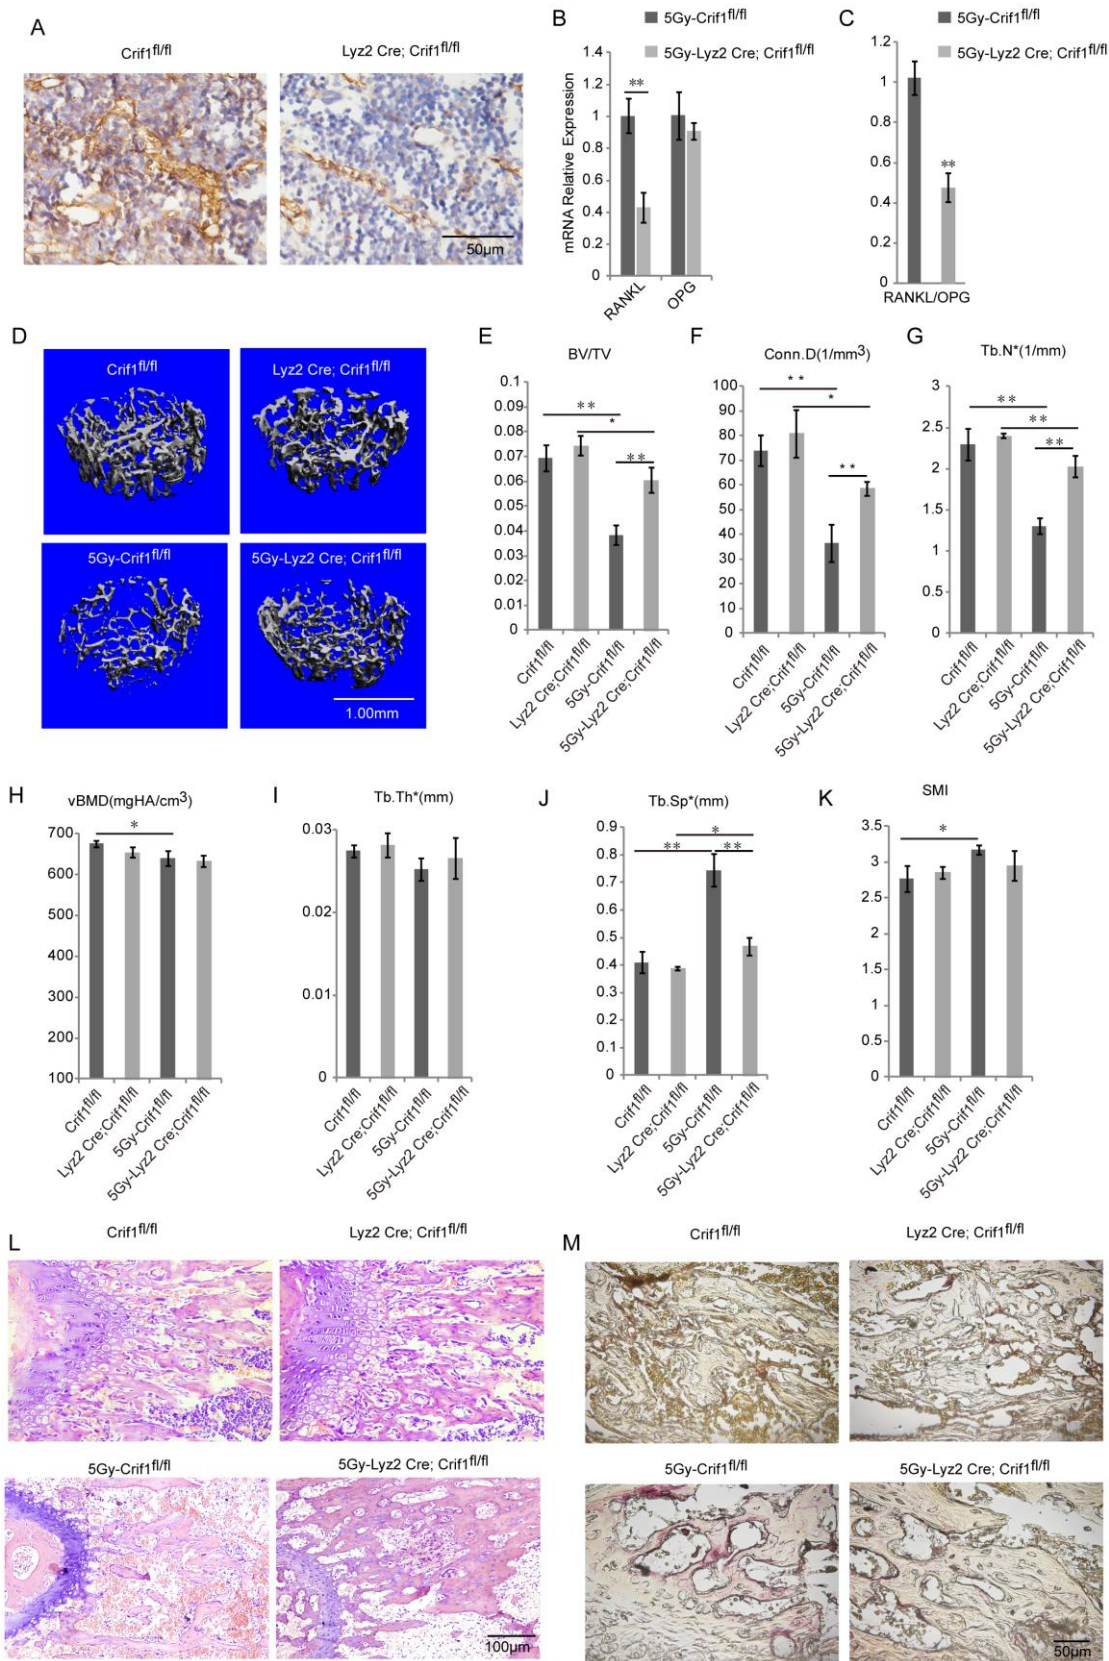

619

620 **Figure 2. Conditional *Crif1* deletion from bone marrow reduces bone loss after**  
 621 **radiation**

622 (A) Histochemical staining analysis of *Crif1* expression in femoral bone marrow.

623 (B) RT-qPCR analysis of RANKL and OPG mRNA expression in flushed whole bone  
 624 marrow of *Crif1<sup>fl/fl</sup>* mice and *Lyz2Cre;Crif1<sup>fl/fl</sup>* mice after 5 Gy radiation.

625 (C) RANKL/OPG ratio of RT-qPCR results.  
626 (D) Micro-CT images of the distal metaphysis of the femur from *Lyz2Cre;Crif1<sup>fl/fl</sup>* mice and  
627 *Crif1<sup>fl/fl</sup>* mice.  
628 (E-K) Micro-CT analysis of the trabecular bone volume/total volume (E), connectivity  
629 density (F), trabecular number (G), bone mineral density (H), trabecular thickness (I),  
630 trabecular spacing (J), and structure model index (K).  
631 (L) H&E staining of femoral sections from *Crif1<sup>fl/fl</sup>* mice and *Lyz2Cre;Crif1<sup>fl/fl</sup>* mice.  
632 (M) TRAP staining of femoral sections from *Crif1<sup>fl/fl</sup>* mice and *Lyz2Cre;Crif1<sup>fl/fl</sup>* mice.  
633 \* $P < 0.05$ , \*\* $P < 0.01$ . All experiments were performed in triplicate, and the bars represent  
634 the mean  $\pm$  SD.

635  
636  
637  
638  
639  
640  
641  
642  
643  
644  
645  
646  
647  
648  
649  
650  
651  
652  
653  
654  
655  
656  
657



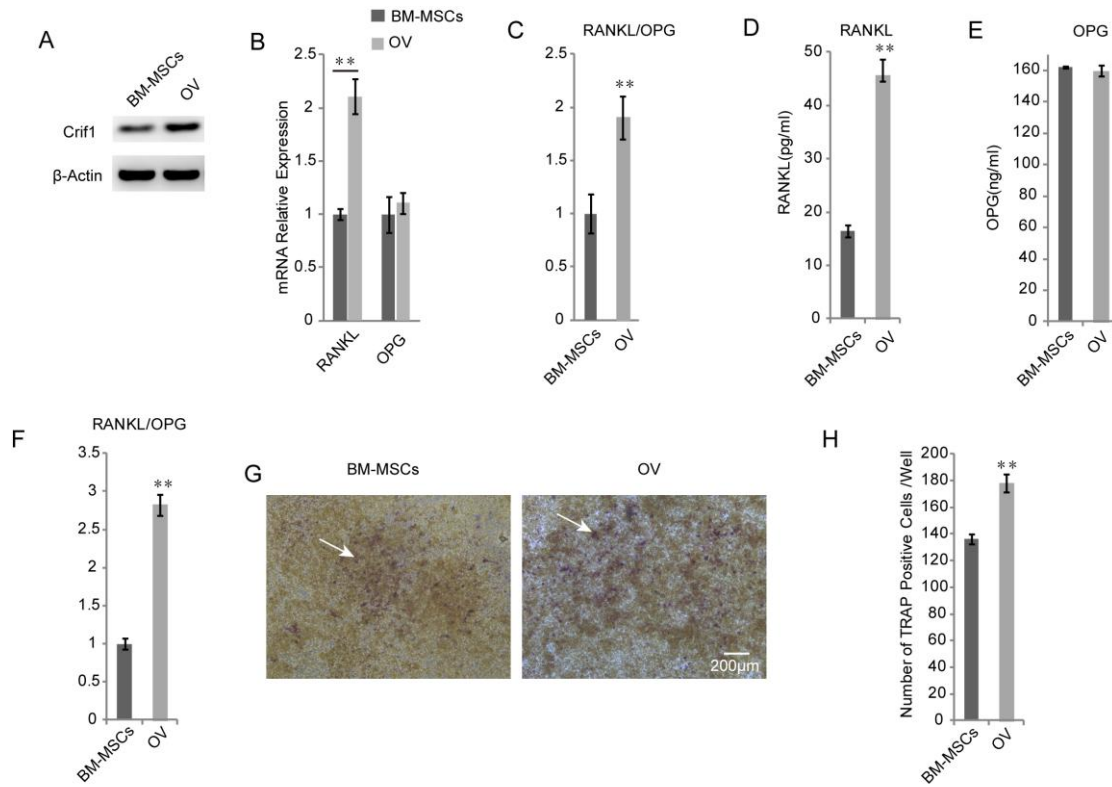

658

659

660

661 **Figure 3. Overexpression of Crif1 in BM-MSCs results in increases in RANKL secretion**  
662 **and the ratio of RANKL to OPG**

663 (A) Western blotting analysis of Crif1 expression in mouse BM-MSCs. Mouse BM-MSCs  
664 were transfected with a Crif1 lentiviral overexpression vector.

665 (B) RT-qPCR analysis of RANKL and OPG mRNA expression in BM-MSCs and  
666 Crif1-overexpressing BM-MSCs (OV). BM-MSCs and OV were cocultured with RAW264.7.

667 (C) RANKL/OPG ratio of RT-qPCR results.

668 (D) ELISA analysis of RANKL protein levels in coculture supernatant medium.

669 (E) ELISA analysis of OPG protein levels in coculture supernatant medium.

670 (F) RANKL/OPG ratio in coculture supernatant medium.

671 (G) TRAP staining of RAW264.7 after 7 days in coculture.

672 (H) Average number of TRAP-positive cells/well (arrow) from RAW264.7 cells in coculture.

673 \* $P < 0.05$ , \*\* $P < 0.01$ . All experiments were performed in triplicate, and the bars represent  
674 the mean  $\pm$  SD.

675

676

677

678

679

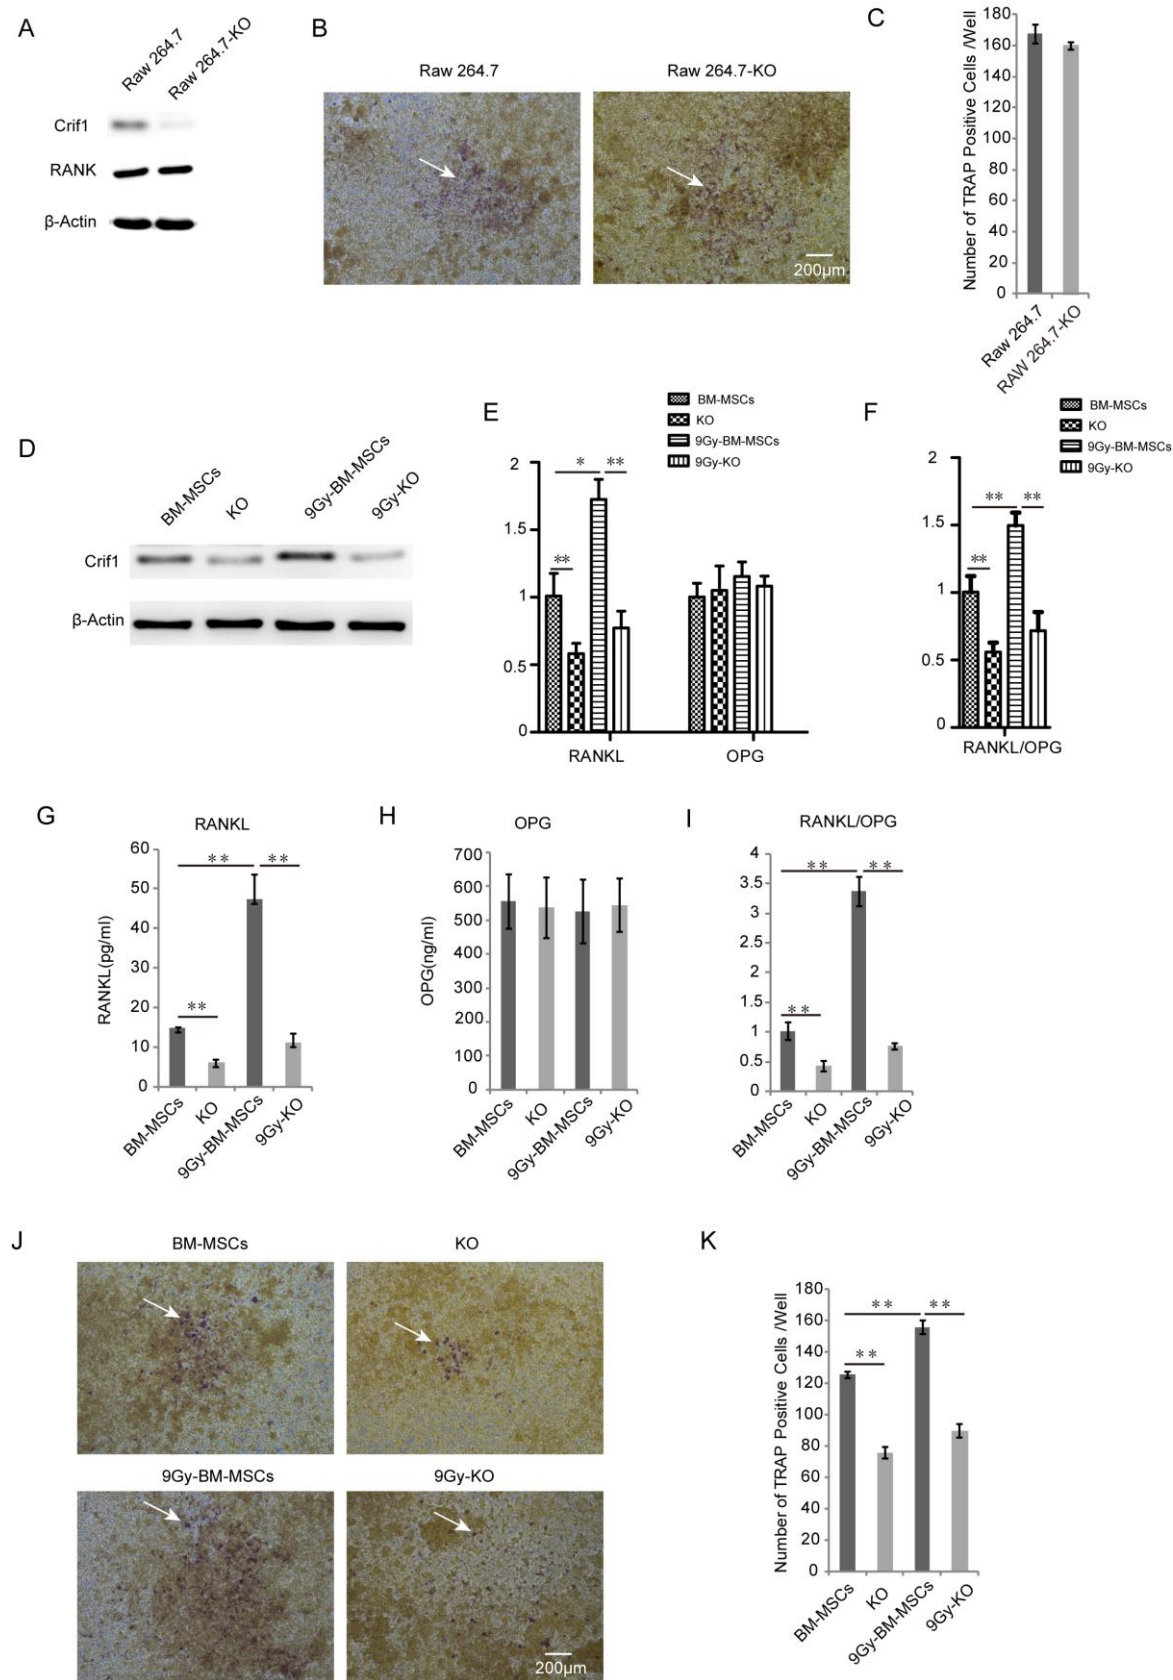

680  
681

**Figure 4. Crif1 is involved in the regulation of RANKL expression after radiation**  
 (A) Western blotting analysis of Crif1 and RANK expression in RAW264.7 cells. Crif1 was  
 knocked out from RAW264.7 cells (RAW264.7-KO).  
 (B) TRAP staining of RAW264.7-KO and controls after 7 days in coculture with mouse  
 BM-MSCs.

- 687 (C) Average number of TRAP-positive cells/well (arrow) from RAW264.7-KO and controls  
688 after 7 days in coculture with mouse BM-MSCs.
- 689 (D) Western blotting analysis of Crif1 expression in BM-MSCs. Crif1 was knocked out from  
690 mouse BM-MSCs (KO), and KO and controls were irradiated with 9 Gy Co-60.
- 691 (E) RT-qPCR analysis of RANKL and OPG mRNA expression in BM-MSCs and Crif1  
692 knockout BM-MSCs (KO). BM-MSCs and KO were cocultured with RAW264.7
- 693 (F) RANKL/OPG ratio of RT-qPCR results.
- 694 (G) ELISA analysis of RANKL protein levels in coculture supernatant medium.
- 695 (H) ELISA analysis of OPG protein levels in coculture supernatant medium.
- 696 (I) RANKL/OPG ratio in coculture supernatant medium.
- 697 (J) TRAP staining of RAW264.7 after 7 days in coculture.
- 698 (K) Average number of TRAP-positive cells/well (arrow) from RAW264.7 in coculture.
- 699 \* $P < 0.05$ , \*\* $P < 0.01$ . All experiments were performed in triplicate, and the bars represent  
700 the mean  $\pm$  SD.

701  
702  
703  
704  
705  
706  
707  
708  
709  
710  
711  
712  
713  
714  
715  
716  
717  
718  
719  
720

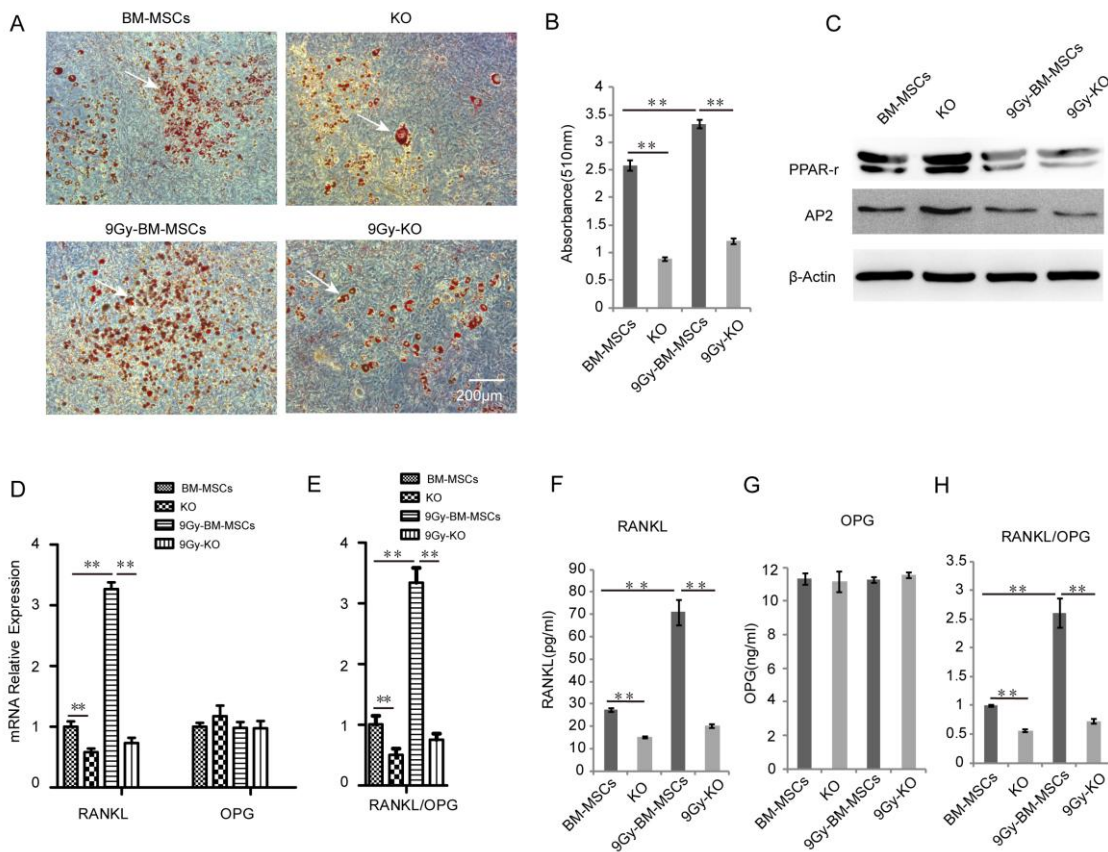

721

722 **Figure 5. Crif1 mediates adipogenesis and RANKL secretion in adipocytes**

723 (A) Oil red O staining analysis of mouse BM-MSCs after 21 days of adipogenic  
 724 differentiation. Crif1 was knocked out from mouse BM-MSCs (KO), and KO and controls  
 725 were irradiated with 9 Gy Co-60. KO and controls were treated with mouse mesenchymal  
 726 stem cell adipogenic differentiation medium (Ad) to induce adipogenesis.

727 (B) The dye from oil red O staining was extracted using isopropanol, and the optical density  
 728 at 510 nm was measured using a Benchmark Plus.

729 (C) Western blotting analysis of adipogenesis-related markers and transcription factors  
 730 PPAR $\gamma$  and AP2 in mouse BM-MSCs after 21 days of adipogenic differentiation.

731 (D) RT-qPCR analysis of RANKL and OPG mRNA expression in BM-MSCs and Crif1  
 732 knockout BM-MSCs (KO).

733 (E) RANKL/OPG ratio of RT-qPCR results.

734 (F) ELISA analysis of RANKL protein levels in supernatant adipogenic differentiation  
 735 medium.

736 (G) ELISA analysis of OPG protein levels in supernatant adipogenic differentiation medium.

737 (H) RANKL/OPG ratio in supernatant adipogenic differentiation medium.

738 \* $P < 0.05$ , \*\* $P < 0.01$ . All experiments were performed in triplicate, and the bars represent  
 739 the mean  $\pm$  SD.

740



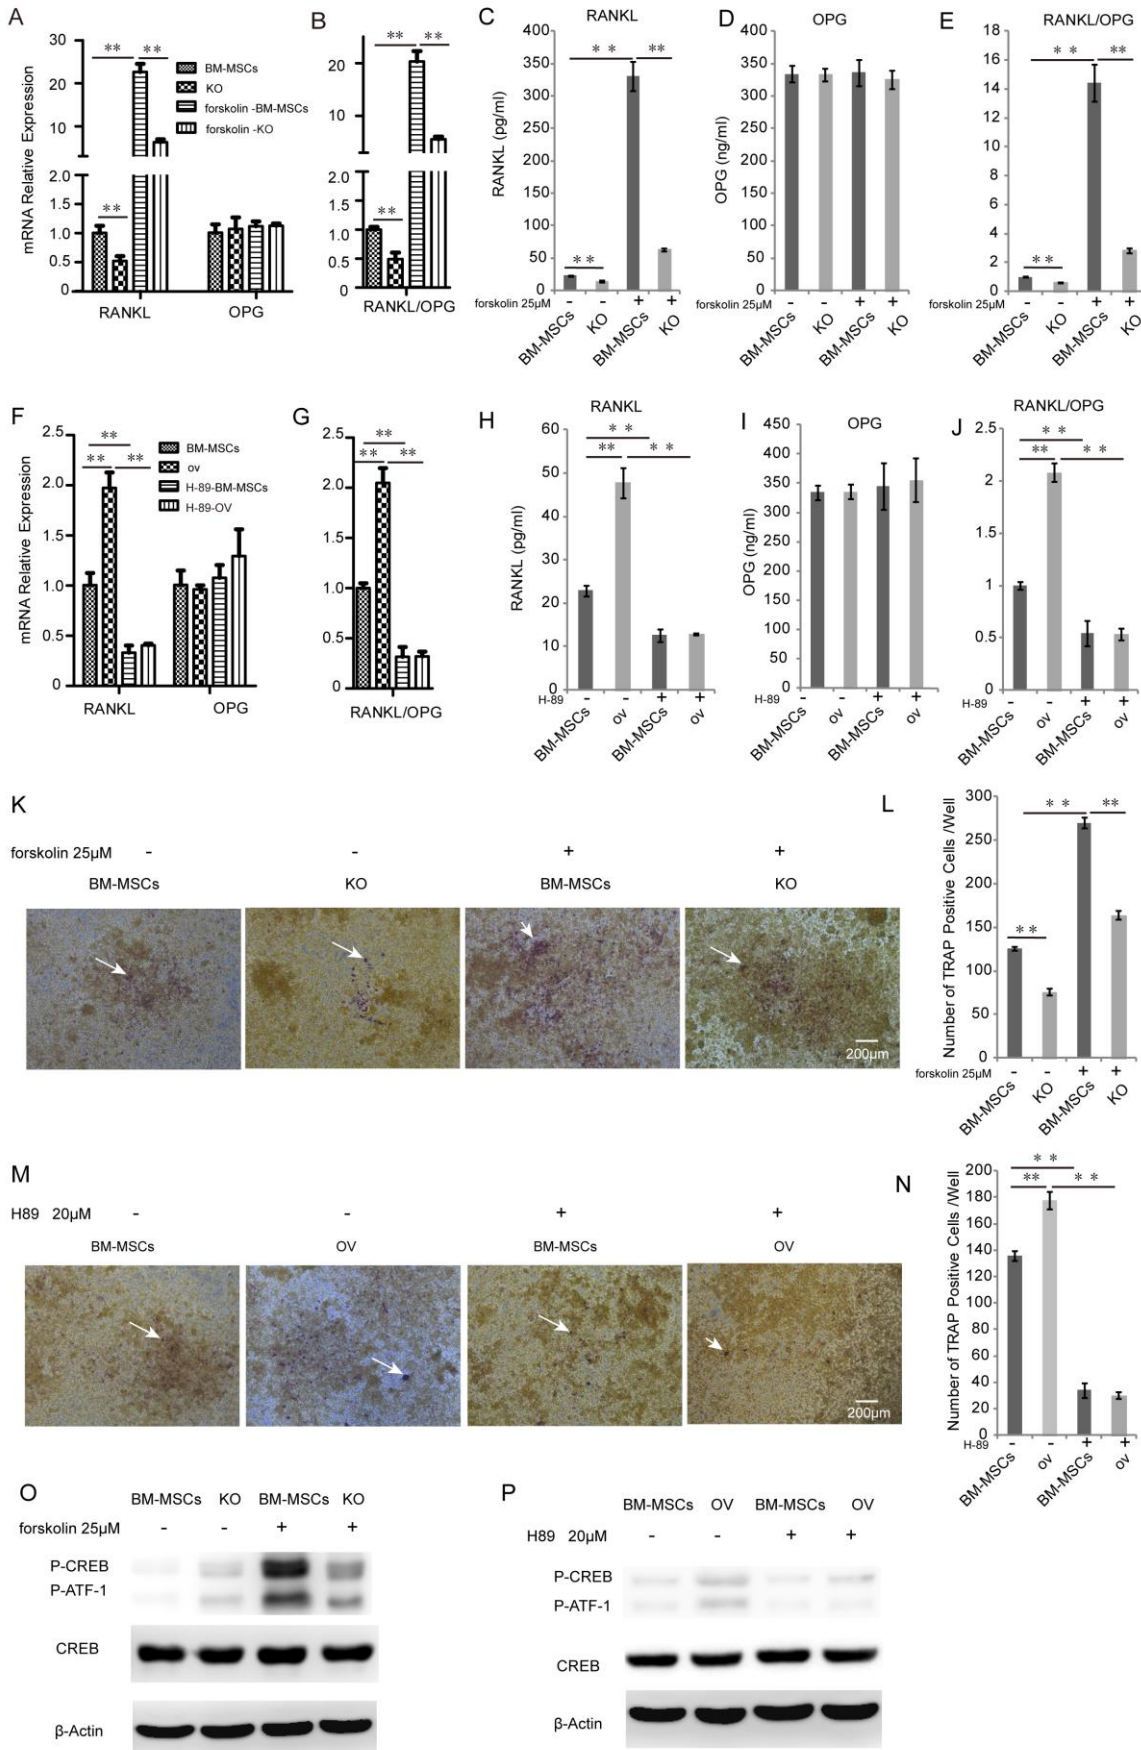

741

742

**Figure 6. Crif1 promotes RANKL secretion by modulating the cAMP/PKA signalling pathway**

743

(A) RT-qPCR analysis of RANKL and OPG mRNA expression in BM-MSCs and Crif1 knockout BM-MSCs (KO). BM-MSCs and KO were cocultured with RAW264.7 with or

745

- 746 without 25  $\mu$ M forskolin respectively.
- 747 (B) RANKL/OPG ratio of RT-qPCR results.
- 748 (C) ELISA analysis of RANKL protein levels in coculture supernatant medium with or  
749 without 25  $\mu$ M forskolin.
- 750 (D) ELISA analysis of OPG protein levels in coculture supernatant medium with or without  
751 25  $\mu$ M forskolin.
- 752 (E) RANKL/OPG ratio in coculture supernatant medium with or without 25  $\mu$ M forskolin.
- 753 (F) RT-qPCR analysis of RANKL and OPG mRNA expression in BM-MSCs and  
754 Crif1-overexpressing BM-MSCs (OV). BM-MSCs and OV were cocultured with RAW264.7  
755 with or without 20  $\mu$ M H89 respectively.
- 756 (G) RANKL/OPG ratio of RT-qPCR results.
- 757 (H) ELISA analysis of RANKL protein levels in coculture supernatant medium with or  
758 without 20  $\mu$ M H89.
- 759 (I) ELISA analysis of OPG protein levels in coculture supernatant medium with or without 20  
760  $\mu$ M H89.
- 761 (J) RANKL/OPG ratio in coculture supernatant medium with or without 20  $\mu$ M H89.
- 762 (K) TRAP staining of RAW264.7 in coculture treated with or without 25  $\mu$ M forskolin.
- 763 (L) Average number of TRAP-positive cells/well (arrow) from RAW264.7 in coculture  
764 treated with or without 25  $\mu$ M forskolin.
- 765 (M) TRAP staining of RAW264.7 in coculture treated with or without 20  $\mu$ M H89.
- 766 (N) Average number of TRAP-positive cells/well (arrow) from RAW264.7 in coculture  
767 treated with or without 20  $\mu$ M H89.
- 768 (O) Western blotting analysis of CREB phosphorylation levels in BM-MSCs in coculture  
769 treated with or without 25  $\mu$ M forskolin.
- 770 (P) Western blotting analysis of CREB phosphorylation levels in BM-MSCs in coculture  
771 treated with or without 20  $\mu$ M H89.
- 772 \* $P < 0.05$ , \*\* $P < 0.01$ ..All experiments were performed in triplicate, and the bars represent  
773 the mean  $\pm$  SD.

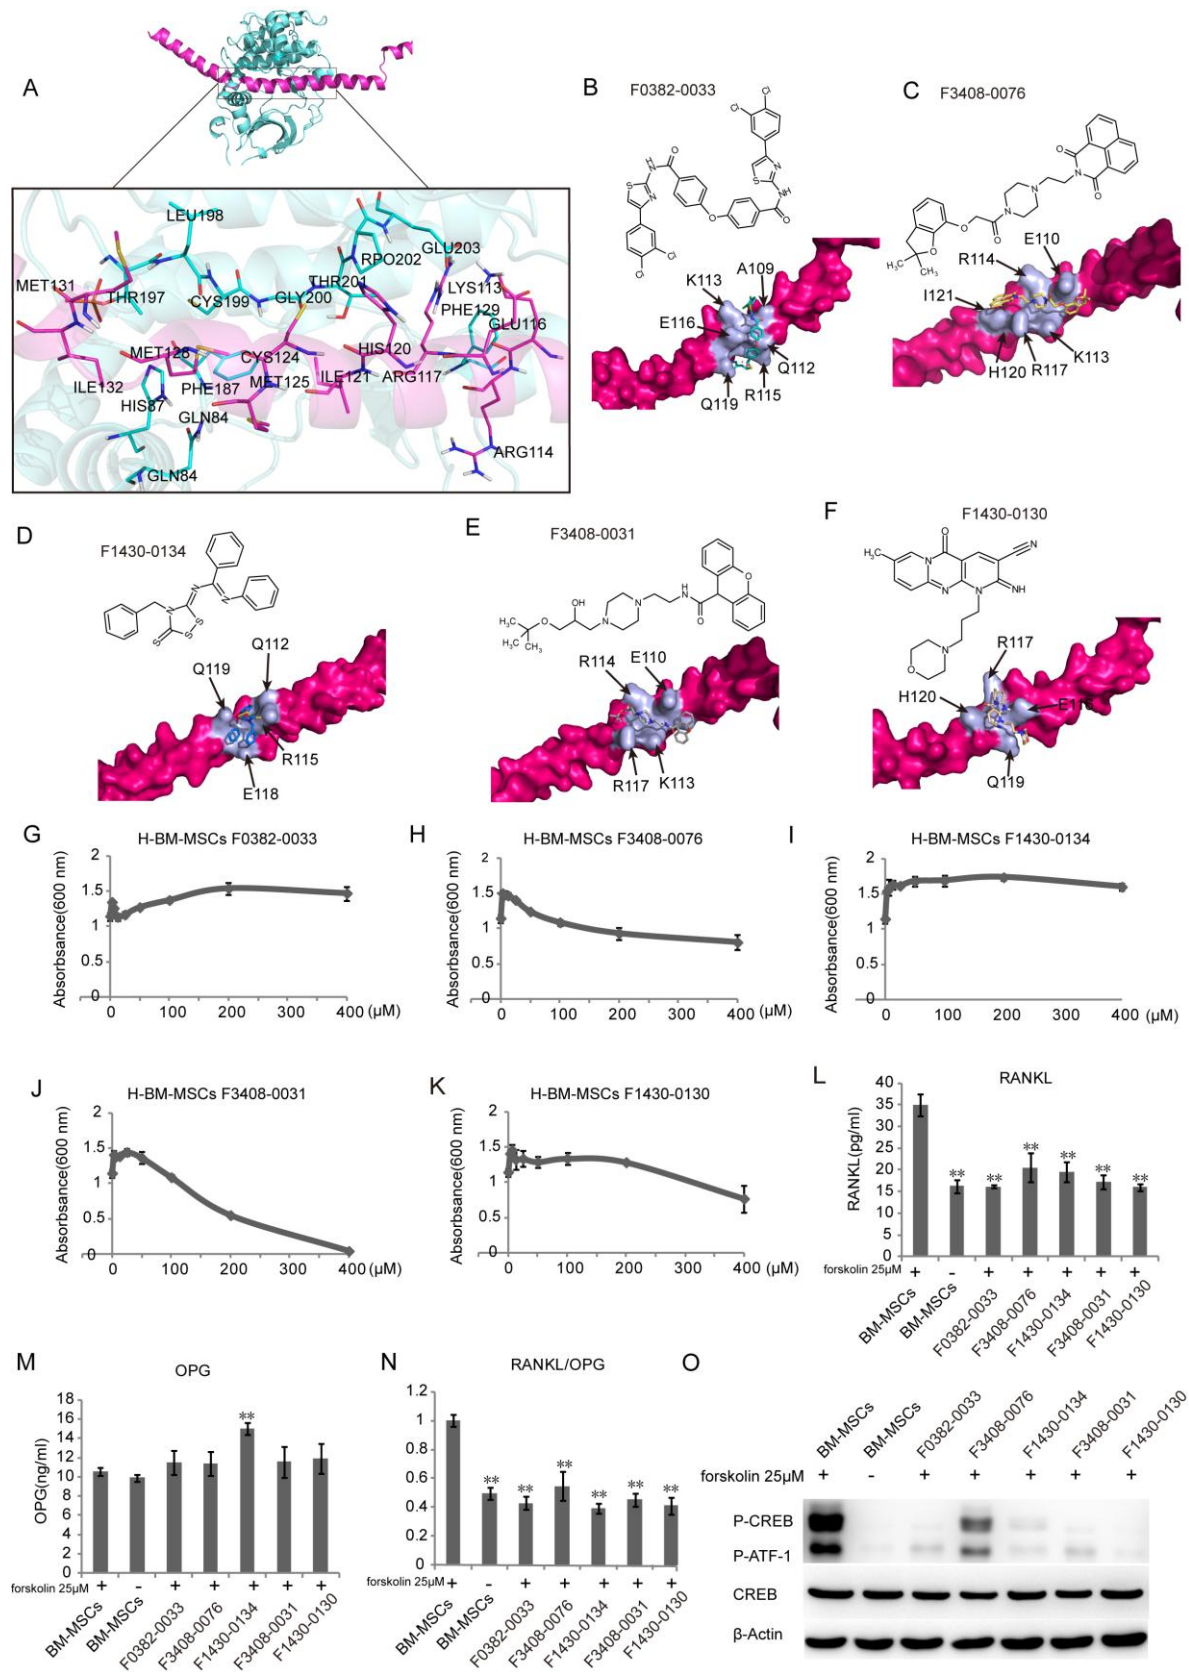

774

775

776

777 **Figure 7. Crif1 inhibitors effectively suppress RANKL secretion and CREB**  
 778 **phosphorylation**

779 (A) Crif1-PKA $\alpha$  interaction model showing Crif1 (colored in rose red) and PKA $\alpha$  (colored  
 780 in cyan). Interface amino acids are shown as sticks and colored in rose red (for Crif1) and

781 cyan (for PKA $\alpha$ ) and indicated as a zoomed-in view in the inset figure.  
782 (B-F) Chemical structure of each inhibitor molecule and their docked pose on Crif1 (colored  
783 in rose red, surface view). Docked molecule (stick) and the amino acids involved in the  
784 hydrophobic interactions (light purple) are shown. F0382-0033 (B), F3408-0076 (C),  
785 F1430-0134 (D), F3408-0031 (E) and F1430-0130 (F).  
786 (G-K) A tetrazolium salt (WST-8) assay was carried out to study the toxicity effect of  
787 compounds on the hBM-MSCs. F0382-0033 (G), F3408-0076 (H), F1430-0134 (I),  
788 F3408-0031 (J) and F1430-0130 (K).  
789 (L) ELISA analysis of RANKL protein levels in supernatant medium. hBM-MSCs were  
790 pretreated with 5 different compounds followed by treatment with forskolin, and supernatant  
791 medium was collected for ELISA after 3 days.  
792 (M) ELISA analysis of OPG protein levels in supernatant medium.  
793 (N) RANKL/OPG ratio in supernatant medium.  
794 (O) Western blotting analysis of CREB phosphorylation levels. hBM-MSCs were pretreated  
795 with 5 different compounds followed by treatment with forskolin and total protein lysates  
796 were extracted for CREB phosphorylation detection after 1 hour.  
797 \* $P < 0.05$ , \*\* $P < 0.01$ . All experiments were performed in triplicate, and the bars represent  
798 the mean  $\pm$  SD.

799  
800  
801  
802  
803  
804  
805  
806  
807  
808  
809  
810  
811  
812  
813  
814  
815  
816  
817  
818  
819  
820  
821  
822  
823  
824  
825  
826  
827



828 **Supplementary data**

829

830

| <b>Compound Name</b> | <b>Affinity (kcal/mol)</b> |
|----------------------|----------------------------|
| <b>F3408-0076</b>    | -14.6                      |
| <b>F0382-0033</b>    | -13.1                      |
| <b>F1430-0130</b>    | -12.9                      |
| <b>F0808-0153</b>    | -12.5                      |
| <b>F0808-0131</b>    | -12.5                      |
| <b>F0808-0151</b>    | -12.4                      |
| <b>F0808-1181</b>    | -12.4                      |
| <b>F0808-1175</b>    | -12.4                      |
| <b>F1269-0120</b>    | -12.3                      |
| <b>F0808-0152</b>    | -12.2                      |
| <b>F3408-0031</b>    | -12.2                      |
| <b>F1430-0134</b>    | -12                        |
| <b>F1430-0138</b>    | -12                        |

831

832

833 Table S1. 13 compounds were chosen based on binding energy <-12.0 kcal/mol.

834

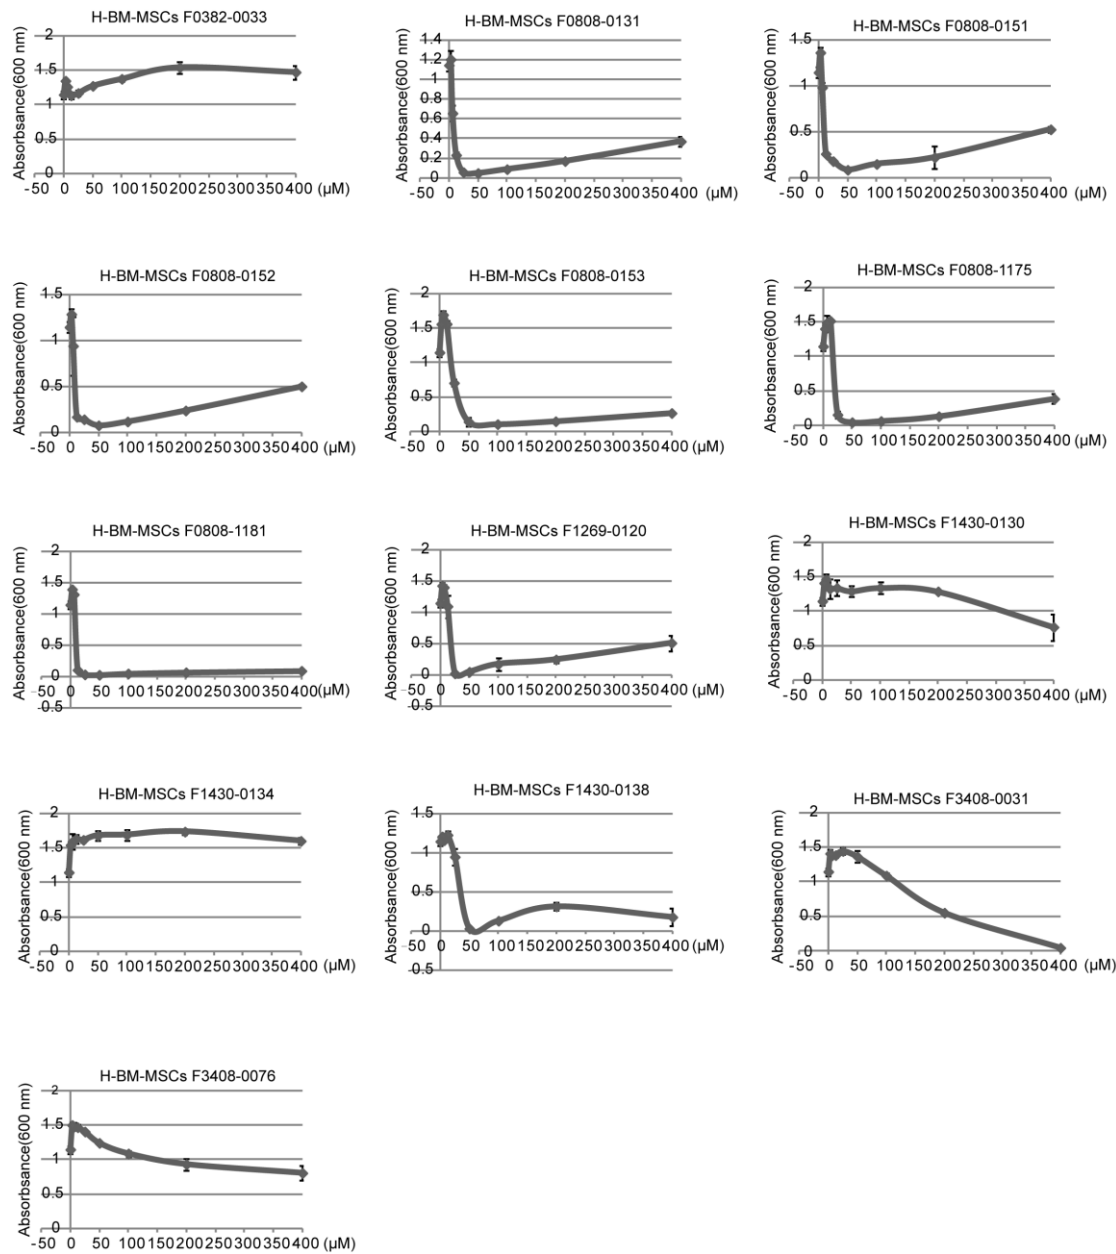

835  
836  
837  
838  
839  
840  
841  
842  
843  
844  
845  
846  
847

Figure S1. A tetrazolium salt (WST-8) assay was carried out to study the toxic effects of compounds on H-BM-MSCs.

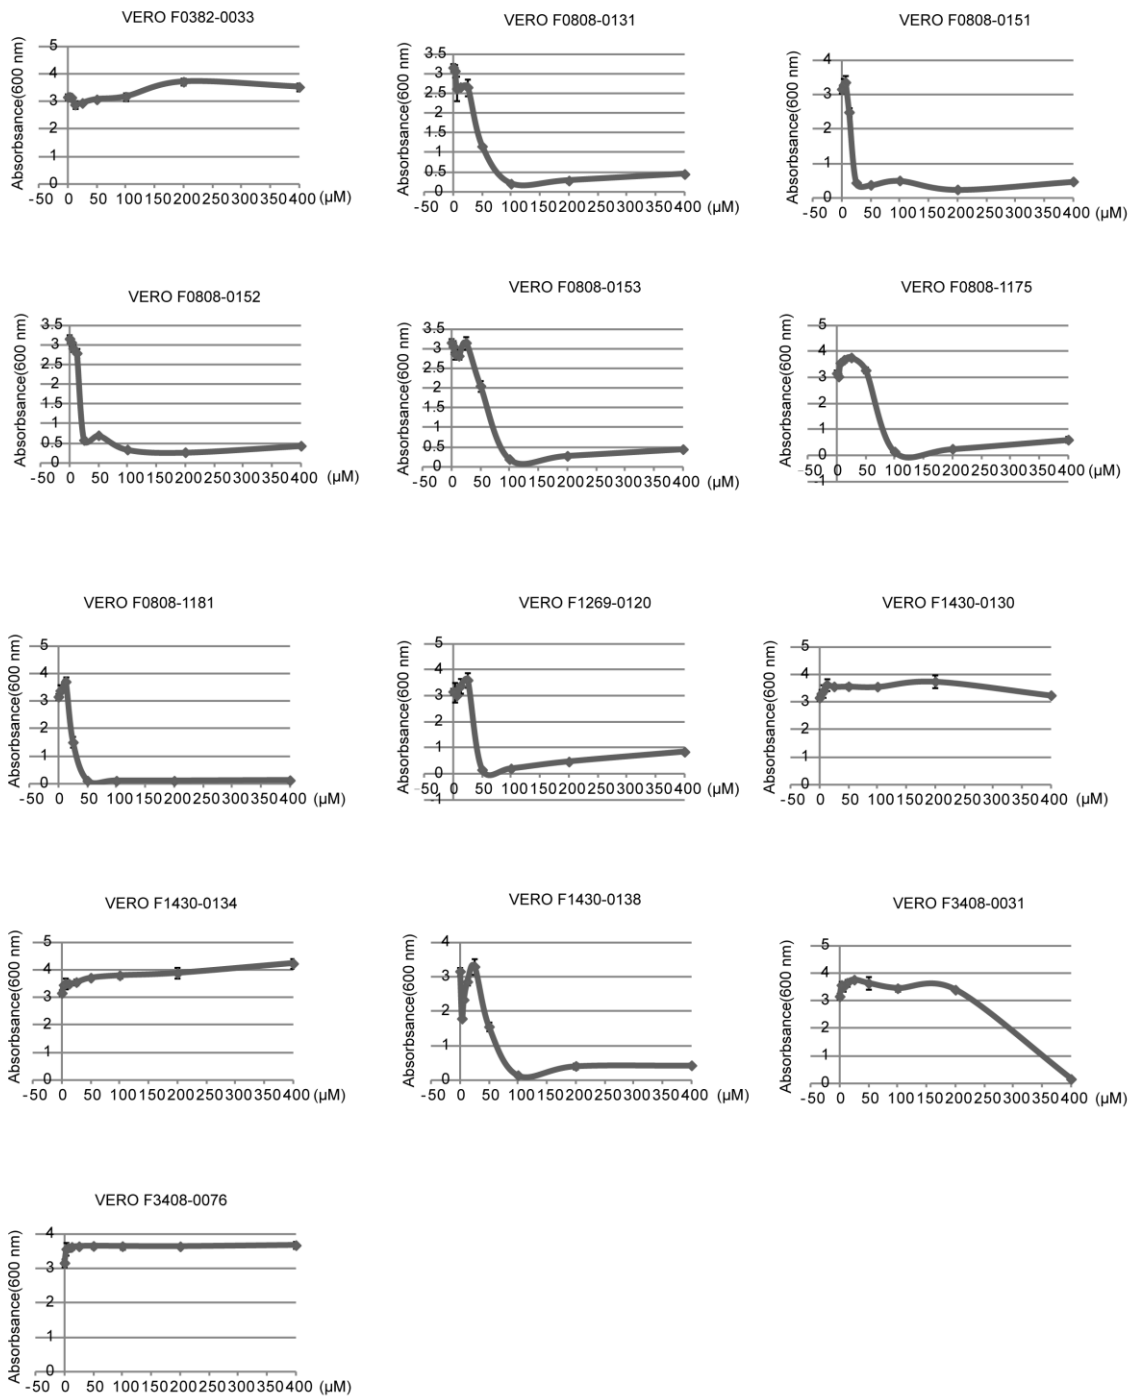

848

849

850 Figure S2. A tetrazolium salt (WST-8) assay was carried out to study the toxic effects of  
851 compounds on vero cells.

852

853

854

855

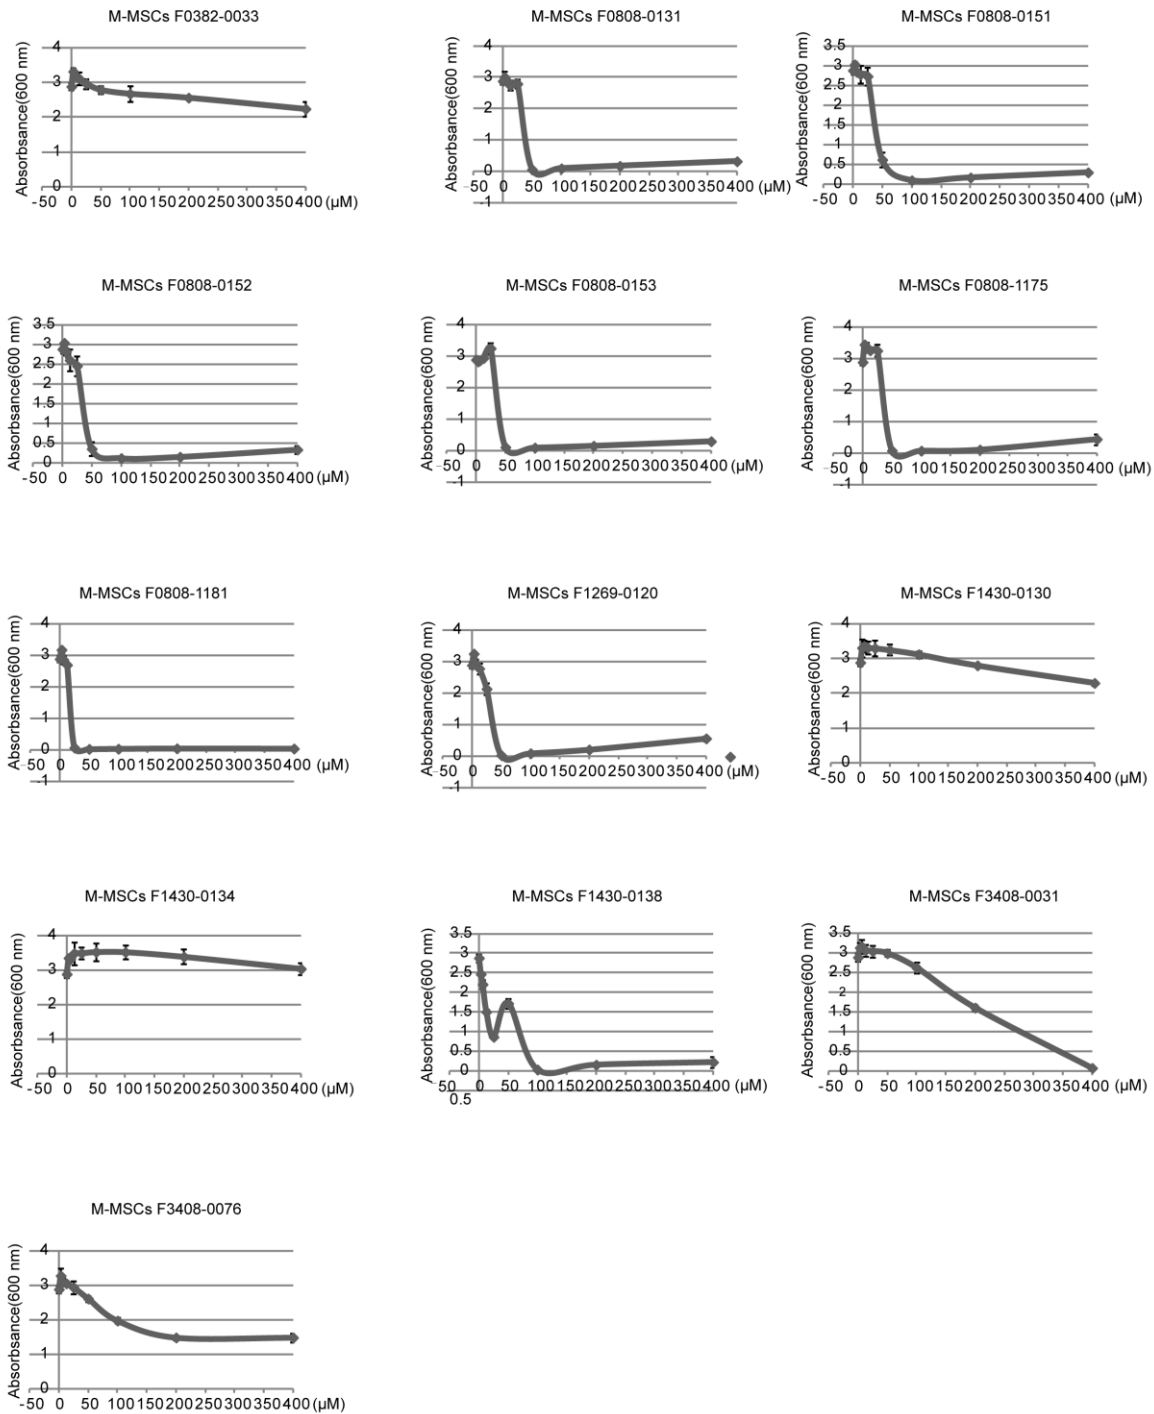

856

857

858

859 Figure S3. A tetrazolium salt (WST-8) assay was carried out to study the toxic effects of  
860 compounds on mouse BM-MSCs.

861

862

863

864

865

866

867
